# Supplementary material for: Western diet contributes to the pathogenesis of non-alcoholic steatohepatitis in male mice via remodeling gut microbiota and increasing production of 2-oleoylglycerol
Source: PubMed Central journal article supplement (PMC9842745; doi:10.1038/s41467-023-35861-1), 2023-01-16
Supplement: 41467_2023_35861_MOESM1_ESM.pdf [file 41467_2023_35861_MOESM1_ESM.pdf]

**Supplementary Information for**

**Western diet contributes to the pathogenesis of non-alcoholic steatohepatitis in male mice via remodeling gut microbiota and increasing production of 2-oleoylglycerol**

**Yang et al.**

**This PDF file includes:**

Supplementary Fig. 1 to Fig. 23

Supplementary Table 1 to Table 5

## Supplementary Figures and Figure Legends

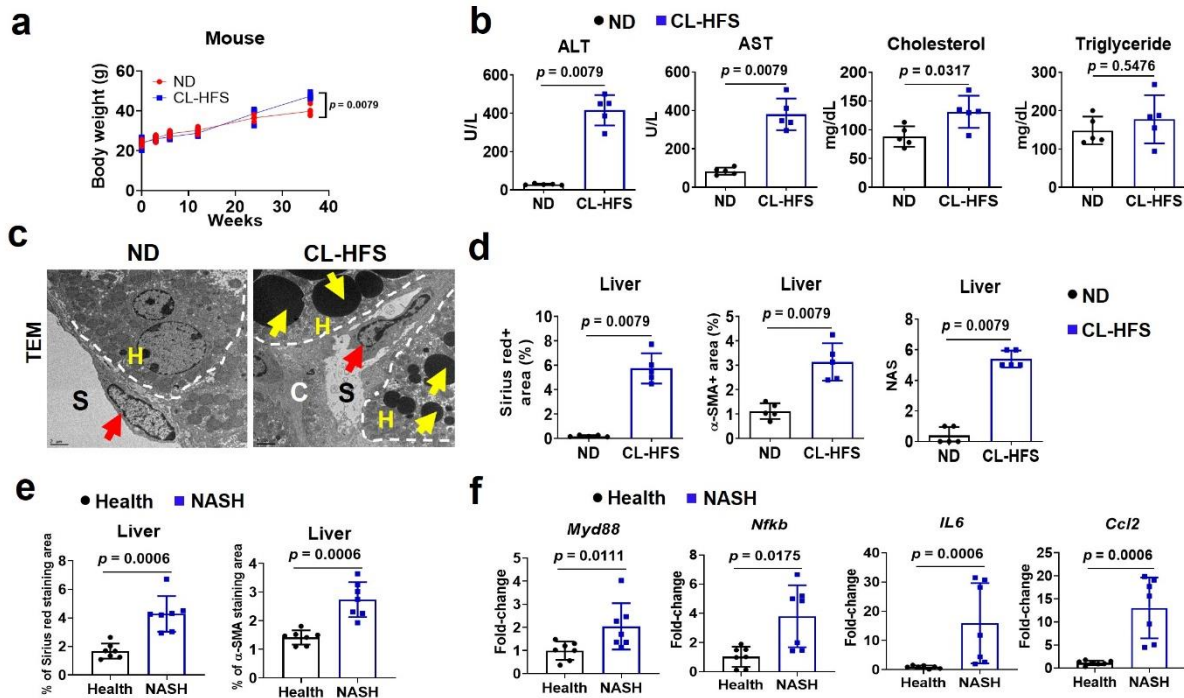

**Supplementary Fig. 1. Characterization of a new mouse NASH model induced with a CL-HFS.** Six-week-old WT mice were divided into two groups which received either ND or CL-HFS up to 36 weeks. **a** Mean bodyweight. Individual mice were weighed at the indicated time points and the mean body weights of mice in each experimental group were calculated. At week 36, a significantly increased body weight was detected in CL-HFS-fed mice compared to ND-fed mice. **b** Liver injury in ND- and CL-HFS-fed mice. Levels of ALT, AST, cholesterol, and triglyceride in the plasma of ND- and CL-HFS-fed mice were measured after receiving the diet for 12 weeks (Fig. 1a). Significantly increased serum levels of ALT and AST were detected in CL-HFS-fed mice compared to ND-fed mice. For **a**, **b**, and **d**,  $n=5$ , error bars represent mean  $\pm$  SD. **c** TEM imaging. Transmission electron microscope (TEM) imaging showed that CL-HFS induced substantial lipid accumulation in hepatocytes. S: Liver sinusoid; H: Hepatocytes; C: Collagen bundles; Red arrow: liver sinusoid endothelial cells; Yellow arrow: lipid drop; **d** Collagen production,  $\alpha$ -SMA production, and NAS in mouse livers. Semi-quantification of hepatic collagens and  $\alpha$ -SMA production was generated by measuring the area of positive staining for Sirius Red or IHC, respectively performed as described in Figure 1C. NAS, one grading system for NAFLD, was calculated as described in Methods.  $n=5$ , error bars represent mean  $\pm$  SD. **e** Semi-quantification of collagen production in the livers of human patients with NASH and healthy controls. With the method used in **d**, the areas of positive staining for Sirius Red and IHC in Fig. 1f were quantified. **f** Production of

inflammatory cytokine, chemokine, and signaling molecules. qPCR detected the increased mRNA expression of genes *IL6*, *Ccl2*, *Myd88*, and *Nfkb* in the livers of human patients with NASH compared to healthy individuals. For **e** and **f**, n=7, data are presented as mean  $\pm$  SD. Statistical analysis of data was performed by Mann–Whitney test (two-tailed). Source data are provided as a Source Data file.

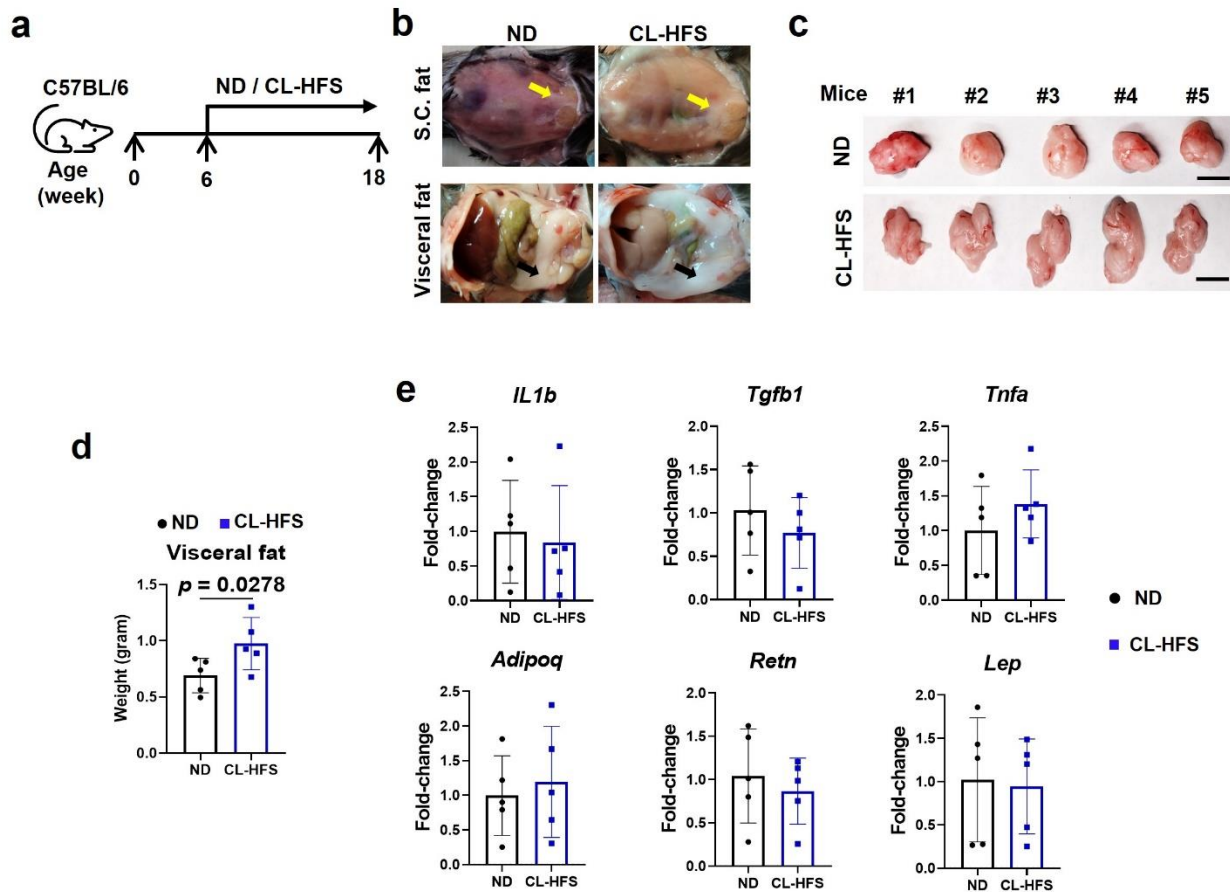

**Supplementary Fig. 2. Accumulation of visceral fat in mice with CL-HFS-induced NASH and production of inflammatory cytokines and adipokines in fat.** **a** An outline depicting induction of NASH with a CL-HFS. Six-week-old WT mice were divided into two groups which received either ND or CL-HFS for 12 weeks. **b** Representative macroscopic view of subcutaneous (yellow arrows) and visceral fat accumulation (black arrows). **c** Visceral fat images from ND and CL-HFS treated mice. Bar: 1 cm. **d** Weight of visceral fat from ND and CL-HFS treated mice. Visceral fat was significantly increased in CL-HFS-fed mice compared to ND-fed mice. **e** mRNA expression of proinflammatory cytokines and adipokines. qPCR did not detect any significant differences in the mRNA levels of proinflammatory genes including *Il1b*, *Tgfb1*, and *Tnfa*, and adipokine genes including *Adipoq* (adiponectin), *Retn* (resistin), and *Lep* (leptin) in visceral adipose tissues between the two groups of mice.  $n=5$ , data are presented as mean  $\pm$  SD. Statistical analysis of data was performed by Mann–Whitney test (One-tailed). Source data are provided as a Source Data file.

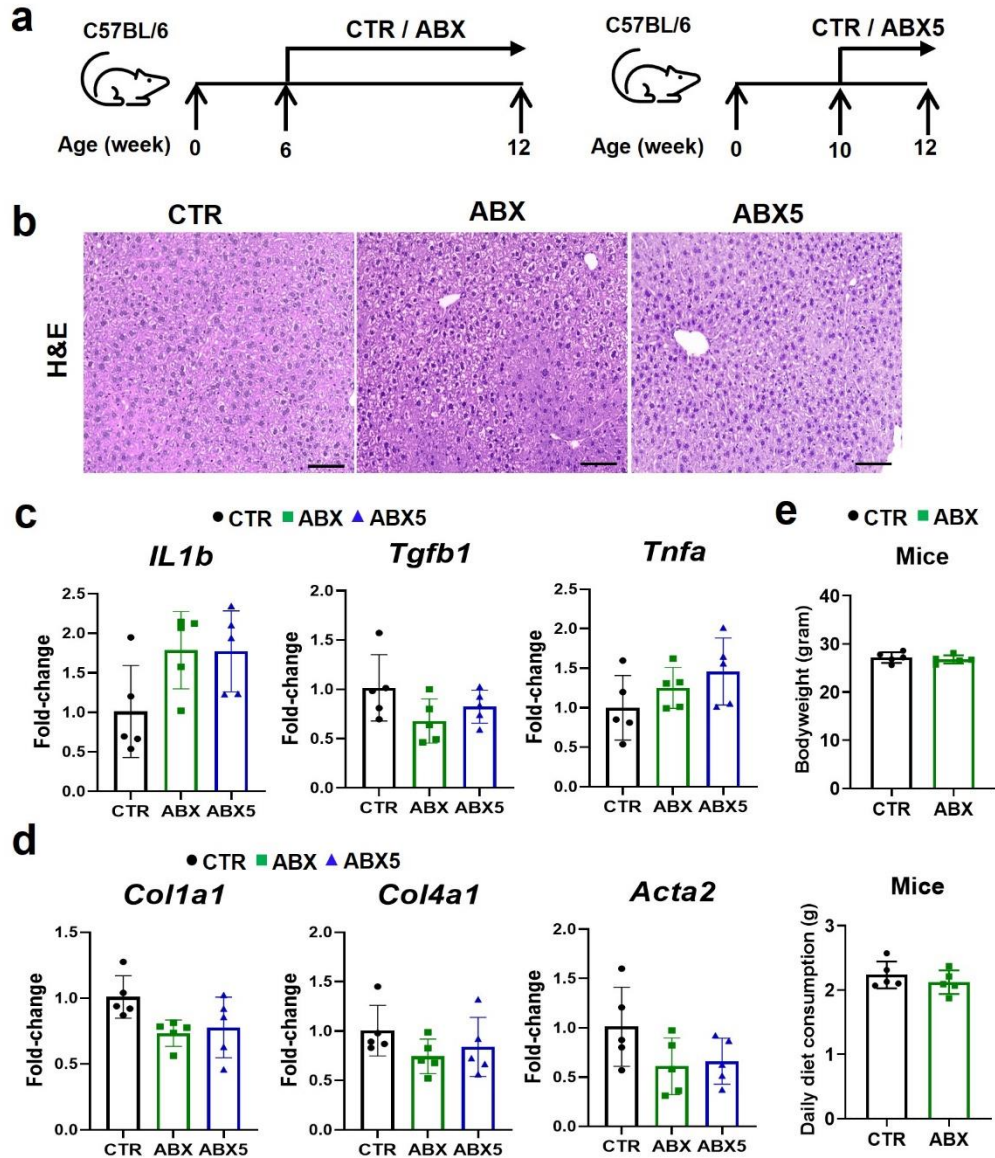

**Supplementary Fig. 3. *In vivo* influence of ABX and ABX5 on liver inflammation and fibrosis in WT mice.** **a** An outline depicting the treatment of mice with ABX or ABX5. Six-week-old WT mice were divided into three groups which received either sterile water, ABX in drinking water for 6 weeks, or ABX5 in drinking water for 2 weeks. **b** Representative microscopic view of H&E staining. Bar: 100 μm. **c** qPCR for detection of mRNA expression of proinflammatory cytokines in liver tissues of mice from each experimental group. **d** qPCR for detection of mRNA expression of extracellular matrix (ECM) genes in liver tissues of mice from each experimental group. qPCR did not detect any significant differences in hepatic mRNA expression of proinflammatory cytokine genes *Il1b*, *Tgfb1*, and *Tnfa*, and ECM genes *Col1a1*, *Col4a1*, and *Acta2* among the three groups of mice. **e** The influence of ABX treatment on mouse body weight and daily food consumption.

n=5, data are presented as mean  $\pm$  SD. Statistical analysis of data was performed by one-way ANOVA with Tukey's multiple comparison test. Source data are provided as a Source Data file.

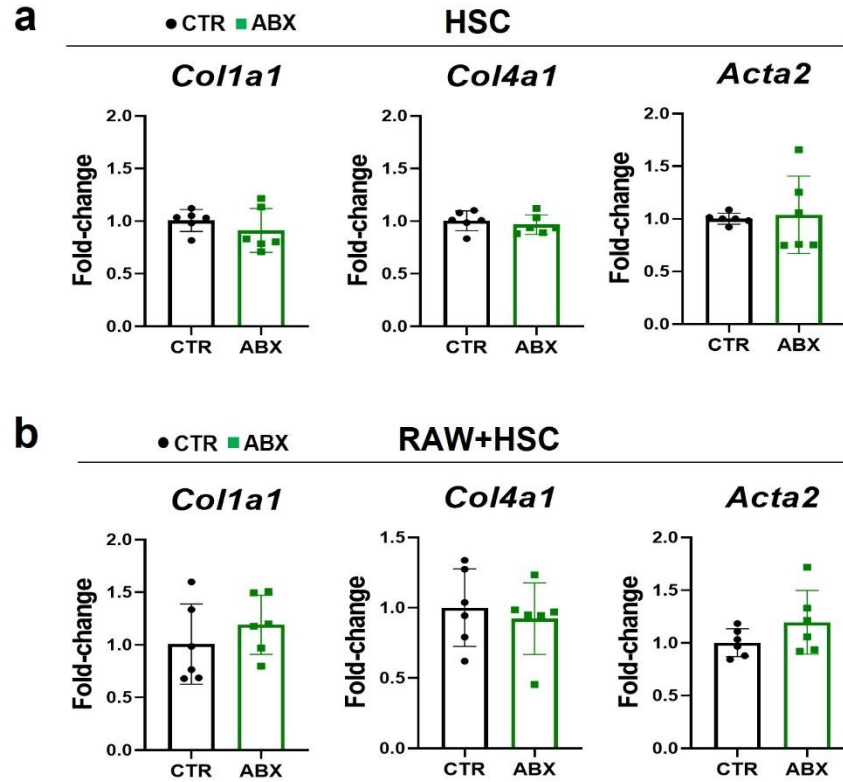

**Supplementary Fig. 4. ABX does not suppress ECM gene expression directly. a** Influence of ABX on the expression of ECM genes in HSCs. **b** Impact of ABX on the expression of ECM genes in co-cultured HSCs and RAW264.7 cells. qPCR did not detect any significant differences in mRNA expression of ECM genes *Col1a1*, *Col4a1*, and *Acta2* in HSCs or HSCs cocultured cells with RAW264.7 cells with or without ABX treatment for 24 hours. n=6, data are presented as mean  $\pm$  SD. Statistical analysis of data was performed by Mann–Whitney test (two-tailed). Source data are provided as a Source Data file.

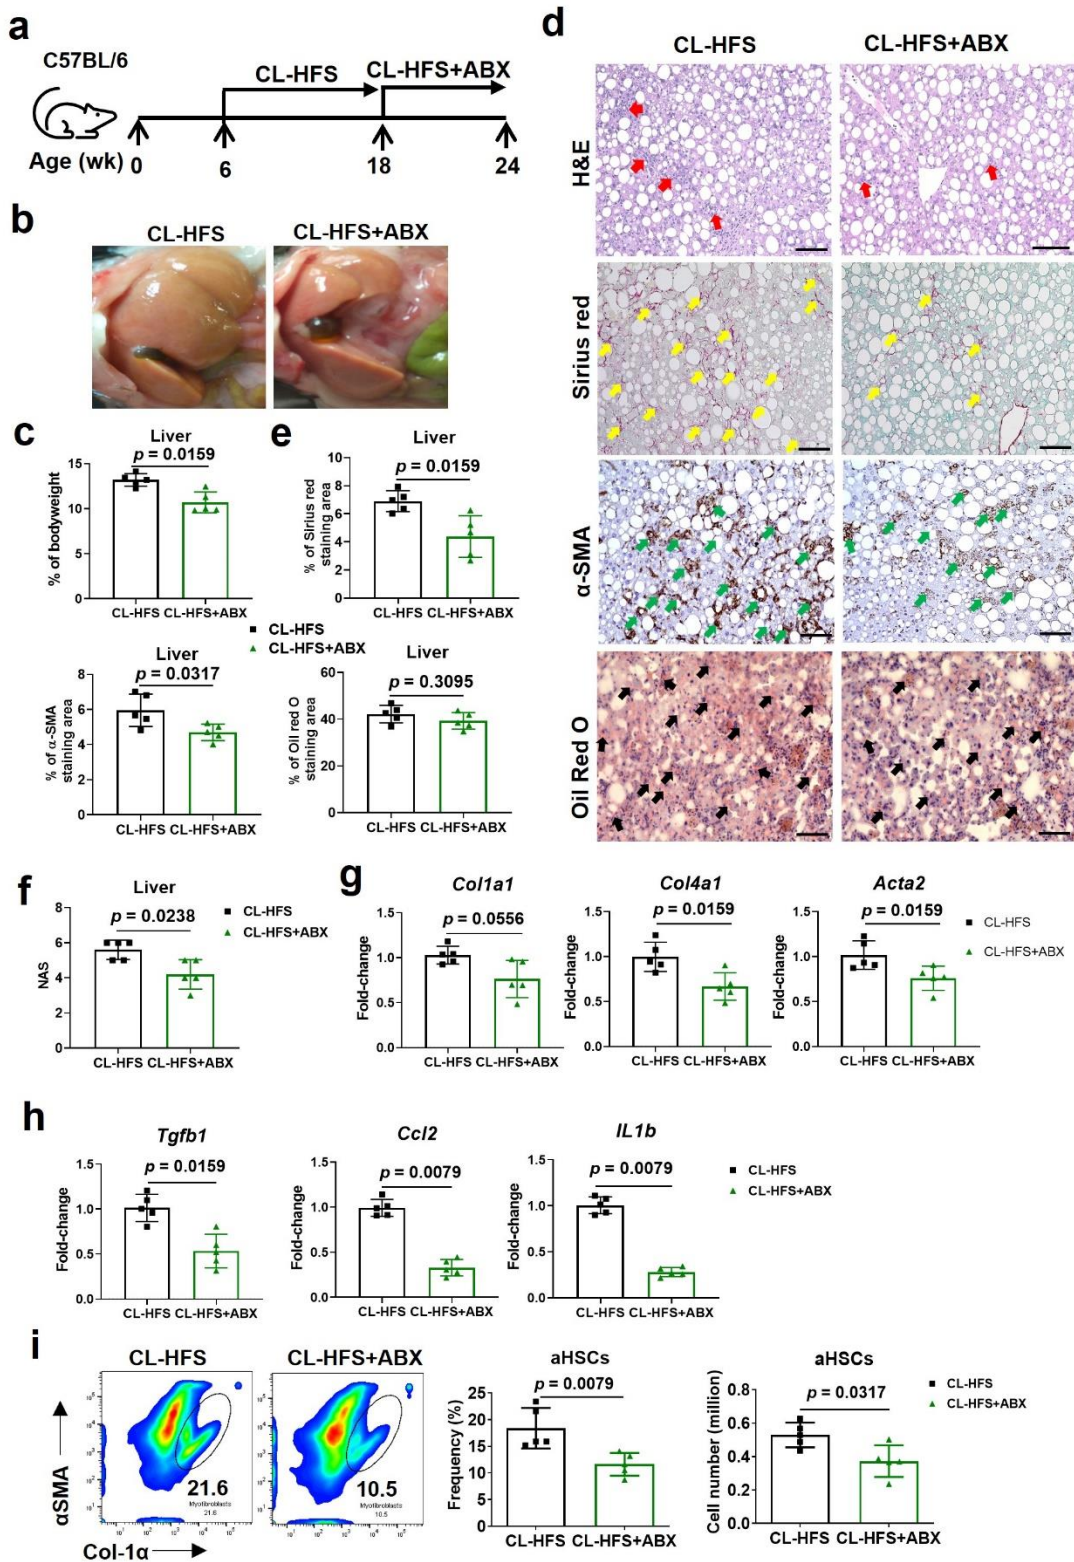

**Supplementary Fig. 5. ABX therapeutically suppresses CL-HFS-induced liver fibrosis and inflammation.** **a** An outline depicting ABX treatment of CL-HFS-fed mice. Six-week-old WT mice



received CL-HFS for 12 weeks to induce NASH. After that, the mice were divided into two groups that did or did not receive ABX treatment. Six weeks later, the mice were euthanized for the following studies. **b** Representative macroscopic images of livers in the control and ABX-treated mice. **c** Liver-to-bodyweight ratios. There was a significant reduction in liver-to-bodyweight ratios in ABX-treated mice versus control mice. **d** Inflammatory cell liver infiltration, hepatic collagen production,  $\alpha$ -SMA production, and lipid accumulation. ABX treatment significantly reduced liver infiltration of inflammatory cells shown by H&E staining (Red arrows point to inflammatory cells), liver collagen production shown by Sirius red staining (Yellow arrows), and liver  $\alpha$ -SMA production detected by IHC staining (Green arrows), but not lipid deposit shown by Oil red O staining (Black arrows). Bar: 100  $\mu$ m. **e** Semi-quantification of hepatic collagen production,  $\alpha$ -SMA production, and lipid accumulation. The cumulative results showed that ABX treatment significantly reduced hepatic collagen and  $\alpha$ -SMA production, but only slightly decreased lipid accumulation. **f** NAS of mice. ABX treatment significantly reduced NAS. **g** Effect of ABX on hepatic mRNA expression of ECM genes. qPCR detection showed that ABX treatment significantly reduced hepatic mRNA expression of genes *Col4a1* and *Acta2*, but not *Col1a1* in the mice. **h** Effect of ABX on hepatic mRNA expression of cytokines and chemokines. qPCR detection showed that ABX treatment significantly reduced hepatic mRNA expression of genes *Tgfb1*, *Ccl2*, and *Il1b* in the mice. **i** Effect of ABX on HSC activation. Representative flow cytometric analysis showed that ABX treatment led to an obvious decrease in the frequency of activated HSCs expressing Col1 $\alpha$  and  $\alpha$ -SMA (Left panel) in the mice. The cumulative results for the mean frequency and cell number of activated HSCs expressing  $\alpha$ -SMA and Col1 $\alpha$  are shown in the right panel. n=5, data are presented as mean  $\pm$  SD. Statistical analysis of data was performed by Mann–Whitney test (two-tailed). Source data are provided as a Source Data file.

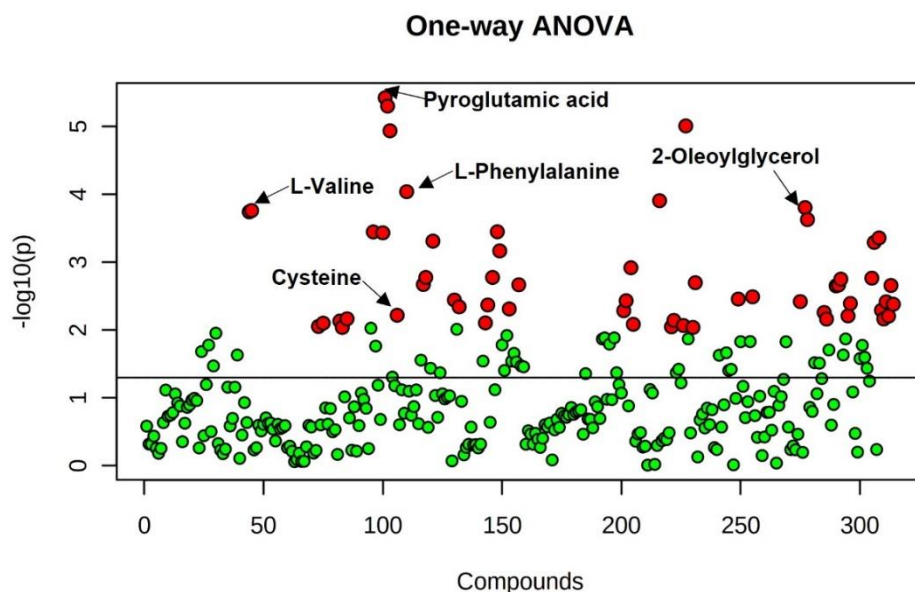

**Supplementary Fig. 6. ABX treatment changes the profile of hepatic metabolites.** Hepatic metabolites were measured and analyzed in ND-fed mice and CL-HFS-fed mice with or without simultaneous ABX treatment as described in Fig. 2. Non-targeted Gas chromatography-mass spectrometry (GC-MS) was used for metabolic analysis as described in Methods. Each dot represents one metabolite. A total of 309 metabolites were detected. All red dots represent metabolites with a significant difference between ND-fed mice versus CL-HFS-fed mice. Among them, five labeled metabolites in CL-HFS-fed mice were significantly decreased after receiving ABX treatment; other unlabeled red dots represent metabolites that are unknown or did not change significantly with ABX treatment. Statistical analysis of data was performed by one-way ANOVA with Tukey's multiple comparison test with MetaboAnalyst 5.0 (<http://www.metaboanalyst.ca>). Source data are provided as a Source Data file.

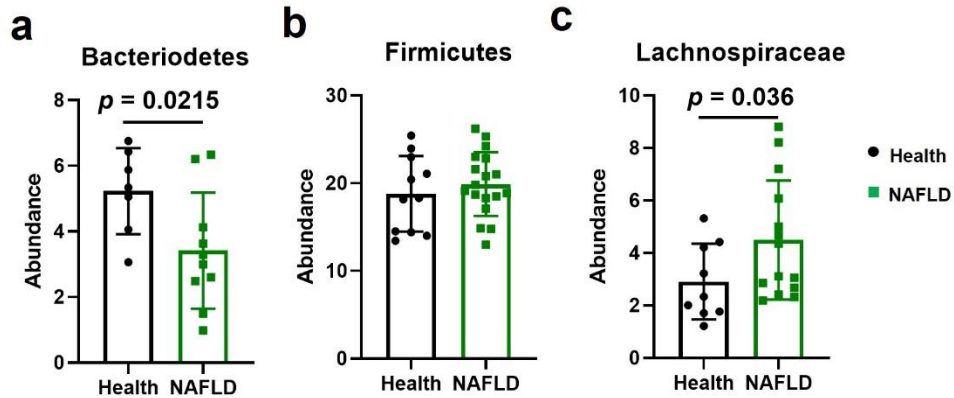

**Supplementary Fig. 7. Gut microbiota dysbiosis in human patients with NAFLD.** Data on gut microbiota from NAFLD patients and healthy controls were collected from BioProject PRJNA540738 (<https://www.ncbi.nlm.nih.gov/bioproject/540738>). **a** There was a decreased abundance of Phylum *Bacteroidetes* in human patients with NAFLD compared to healthy individuals. **b** There was no significant difference in Phylum *Firmicutes* between healthy individuals and human patients with NAFLD. **c** There was a significantly increased abundance of family *Lachnospiraceae* in human patients with NAFLD compared to healthy individuals. Genus *Blautia* belongs to this bacterial family. n=7 (healthy controls) and n=18 (human patients with NAFLD), data are presented as mean  $\pm$  SD. Statistical analysis of data was performed by Mann–Whitney test (One-tailed). Source data are provided as a Source Data file.

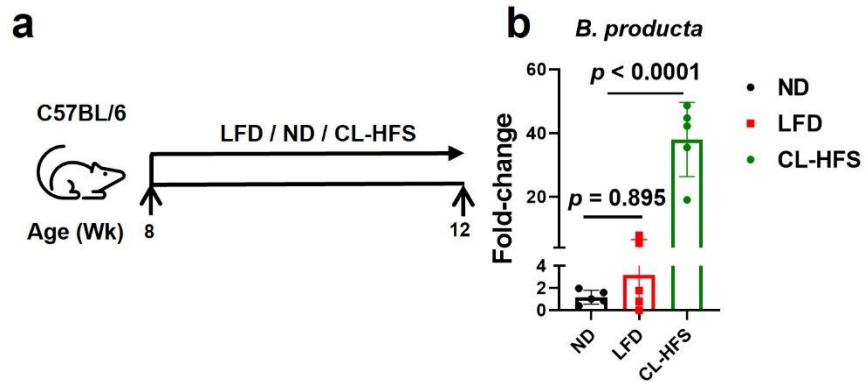

**Supplementary Fig. 8. The abundance of *B. producta* in low-fat diet (LFD)-fed mice.** **a** An outline depicting the treatments of mice with ND, LFD, or CL-HFS. Eight-week-old WT mice were fed with either ND, LFD, or CL-HFS for 4 weeks. Feces were collected for the determination of the relative abundance of *B. producta* with qPCR. **b** *B. producta* abundance in mice feces. qPCR detected a significantly lower abundance of *B. producta* DNAs in the feces of LFD-fed mice and ND-fed mice compared to CL-HFS-fed mice.  $n=5$ , data are presented as mean  $\pm$  SD. Statistical analysis of data was performed by one-way ANOVA with Tukey's multiple comparison test. Source data are provided as a Source Data file.

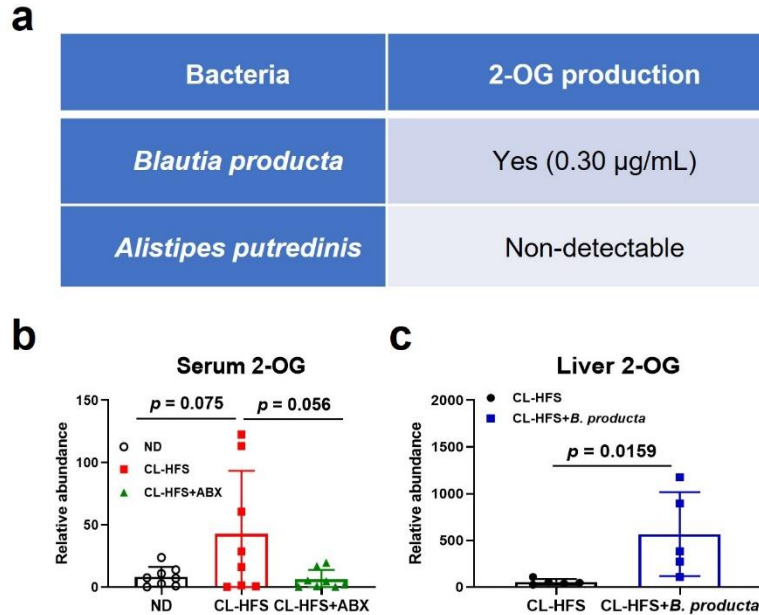

**Supplementary Fig. 9. *B. producta* is lipase-producing bacteria producing 2-OG *in vitro* and *in vivo*.** **a** Evaluating the capacity of *B. producta* to produce 2-OG. Two species of bacteria including lipase-producing *Blautia producta* and control *Alistipes putredinis*, which does not have the lipase gene, were grown in a medium containing ND in anaerobic conditions. 72 hours later, 2-OG production in the culture supernatant was measured by GC-MS. n=3, data are presented as mean concentration. **b** Circulating blood 2-OG production in CL-HFS-fed mice with or without ABX treatment. Serum was collected from the mice as in Fig. 2. Analysis of serum 2-OG was performed by GC-MS. n=8, data are presented as mean  $\pm$  SD. **c** Effect of *B. producta* repopulation on 2-OG production in CL-HFS-fed mice. After receiving CL-HFS for 12 weeks, the mice were sterilized with ABX5 followed by *B. producta* repopulation; 6 weeks later, significantly increased hepatic 2-OG production was detected in the mice compared to control mice without *B. producta* repopulation. n=5, data are presented as mean  $\pm$  SD. Statistical analysis of data was performed by one-way ANOVA with Tukey's multiple comparison test for three groups or Mann–Whitney test (two-tailed) for two groups. Source data are provided as a Source Data file.

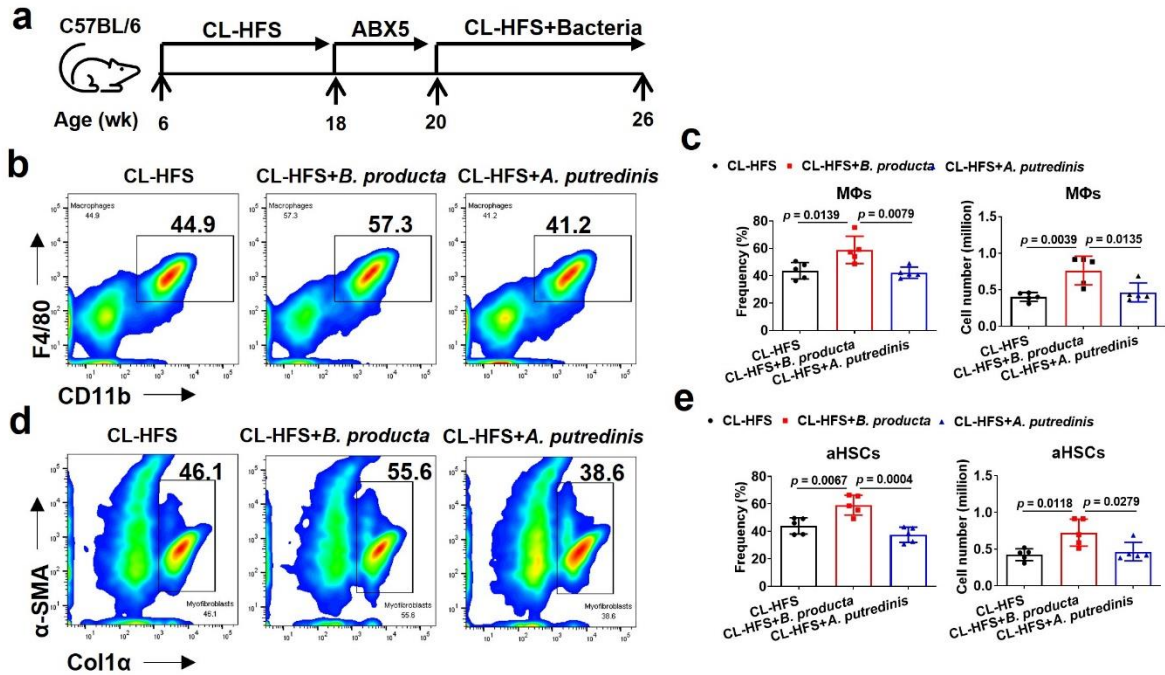

**Supplementary Fig. 10. *B. producta* repopulation activates MΦs and HSCs in NASH mice.**

**a** An outline depicting the experimental design of *B. producta* repopulation. Six-week-old WT mice successively received CL-HFS for 12 weeks to induce NASH, ABX5 treatment for two weeks to sterilize the gut, and oral gavage of *B. producta* (ATCC 27340) or *A. putredinis* (ATCC 29800) for repopulation twice a week at a dose of  $3 \times 10^8$  CFU/mouse in 200  $\mu$ L of PBS. Six weeks after the repopulation, the mice in each group were euthanized for the following studies. **b** Representative frequencies of liver resident MΦs in the indicated mice. Representative flow cytometric analysis showed the frequencies of liver resident MΦs positive for CD11b and F4/80 in each experimental group of mice. Repopulation with *B. producta*, but not *A. putredinis*, increased the frequency of liver resident MΦs positive for CD11b and F4/80. **c** Mean frequency and absolute cell number of MΦs in three groups of mice. The accumulated results suggested that *B. producta* repopulation significantly increased the frequency and the absolute number of liver-resident CD11b<sup>+</sup>F4/80<sup>+</sup>MΦs in CL-HFS-fed mice. **d** Representative frequencies of HSCs in each experimental group of mice. Representative flow cytometric analysis showed that repopulation with *B. producta*, but not *A. putredinis*, led to an increase in the frequency of HSCs expressing Col1a and  $\alpha$ -SMA. **e** Mean frequency and absolute cell number of HSCs in each experimental group of mice. The cumulative results suggested that *B. producta* repopulation significantly increased the frequency and absolute number of HSCs in CL-HFS-fed mice. n=5, data are presented as mean  $\pm$  SD. Statistical analysis of data was performed by one-way ANOVA with Tukey's multiple comparison test. Source data are provided as a Source Data file.

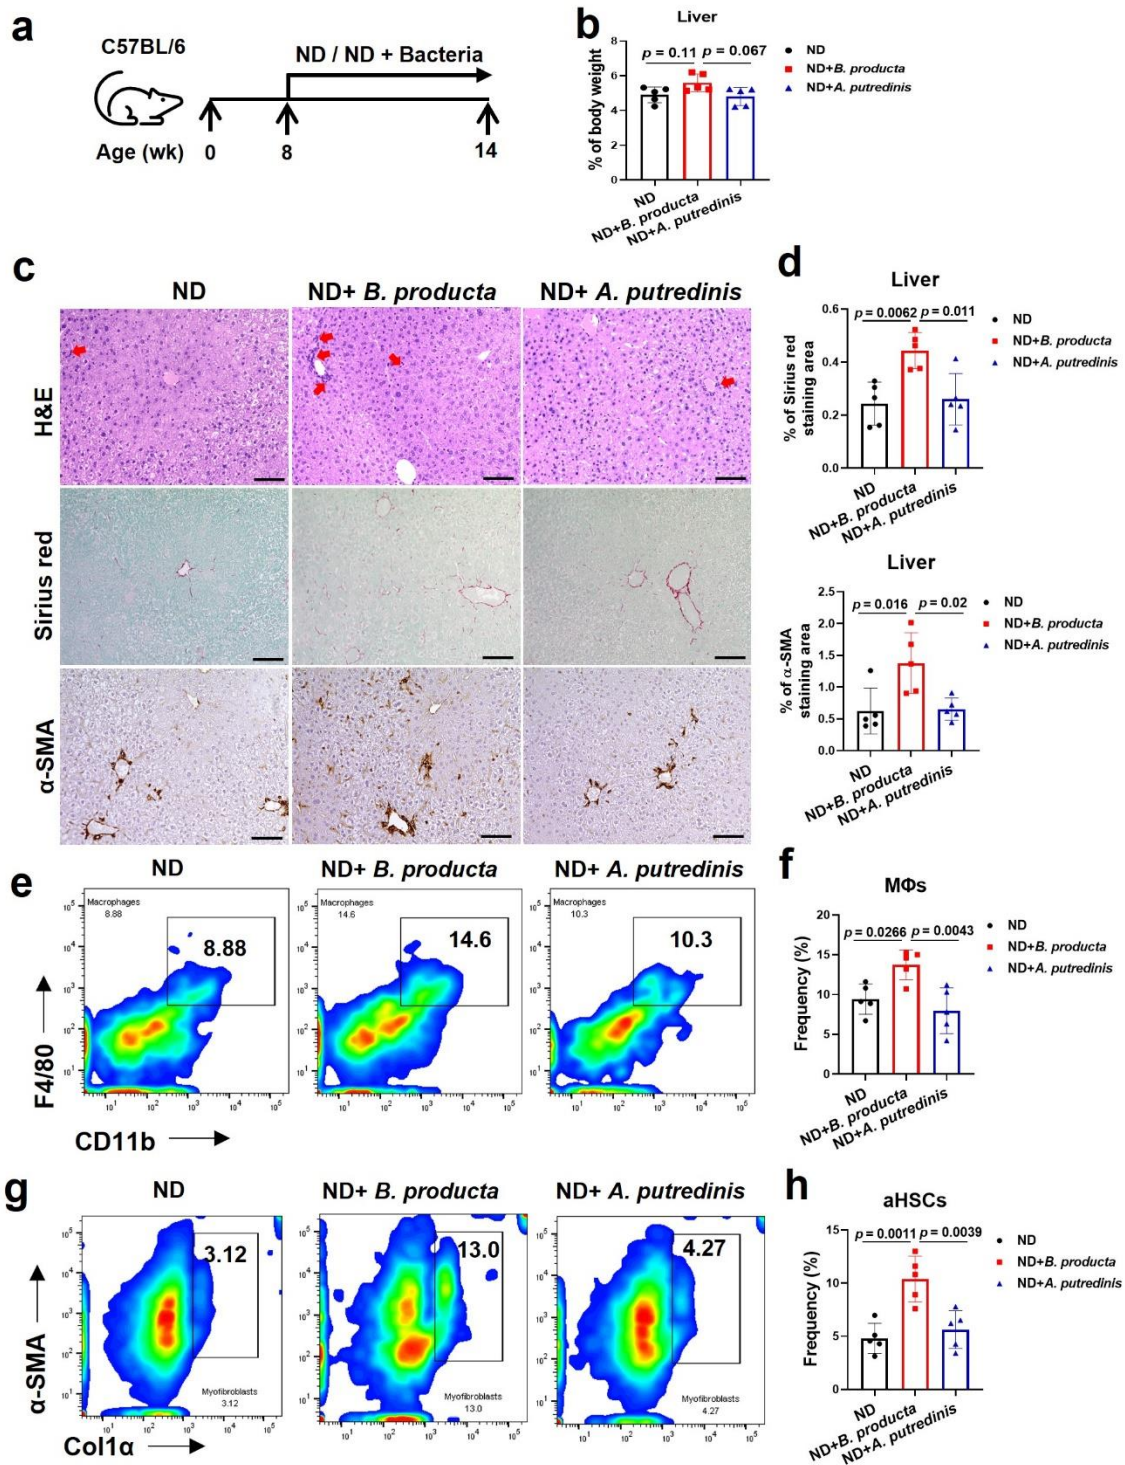

**Supplementary Fig. 11. *B. producta* supplementation activates MΦs and HSCs in ND-fed WT mice.** **a** An outline depicting the experimental design of *B. producta* supplementation. Eight-week-old WT mice successively received oral gavage of *B. producta* or *A. putredinis* twice a week for six weeks at a dose of  $3 \times 10^8$  CFU/mouse in 200  $\mu$ L of volume. After that, the mice in each

group were euthanized for the following studies. **b** Liver-to-bodyweight ratio. There is a significant change in liver-to-bodyweight ratios among different treatments. **c** Inflammatory cell liver infiltration and hepatic collagen and  $\alpha$ -SMA production. H&E staining showed that *B. producta* supplementation increased the inflammatory cell liver infiltration (Top panel: red arrows point to inflammatory cells). Sirius red staining showed that ABX treatment decreased liver collagen production (Middle panel). IHC staining displayed ABX treatment reduced liver  $\alpha$ -SMA production (Low panel). Bar: 100  $\mu$ m. **d** Semi-quantification of hepatic collagen production and  $\alpha$ -SMA production. The cumulative results showed that *B. producta* supplementation significantly increased hepatic collagen and  $\alpha$ -SMA production. **e** Representative flow cytometric analysis showed the frequency of liver resident M $\Phi$ s positive for CD11b and F4/80 in each experimental group of mice. **f** Mean frequency of M $\Phi$ s in three groups of mice. The cumulative results suggest that *B. producta* supplementation significantly increased the frequency of liver resident CD11b<sup>+</sup>F4/80<sup>+</sup>M $\Phi$ s in ND-fed mice. **g** Representative frequencies of HSCs in each experimental group of mice. **h** Mean frequency of HSCs in each experimental group of mice. The cumulative results suggest that *B. producta* supplementation significantly increased the frequency of HSCs expressing Col1 $\alpha$  and  $\alpha$ -SMA in WT mice. n=5, data are presented as mean  $\pm$  SD. Statistical analysis of data was performed by one-way ANOVA with Tukey's multiple comparison test. Source data are provided as a Source Data file.



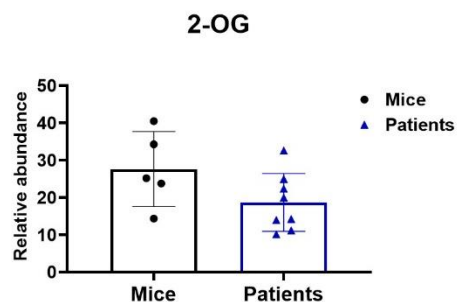

**Supplementary Fig. 12. Comparison of hepatic 2-OG levels in 2-OG treated mice and human patients with obesity.** Mice received 2-OG administration at a dose of 20  $\mu\text{g}/\text{mouse}$  three times a week for 6 weeks as described in Fig. 6a. After that, we harvested livers for GC-MS quantification of 2-OG levels and compared the mouse levels to hepatic 2-OG in the human patients with obesity presented in Fig. 4b.  $n=5$  (mice) and  $n=8$  (patients with obesity), data are presented as mean  $\pm$  SD ( $p > 0.05$ ). Mann–Whitney test (two-tailed) didn't show a statistically significant difference. Source data are provided as a Source Data file.

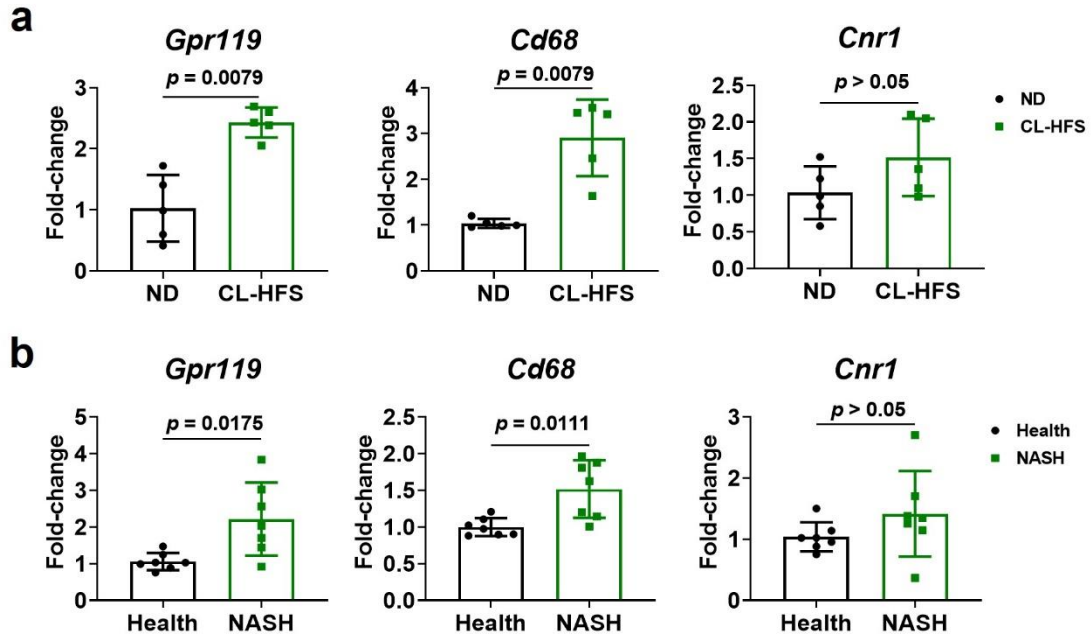

**Supplementary Fig. 13. Increased hepatic expression of *Gpr119* and *Cd68* in mice and human patients with NASH.** **a** Expression of hepatic *Gpr119* and *Cd68* in mice with CL-HFS-induced NASH. qPCR detected significantly increased mRNA expression of hepatic *Gpr119* and *Cd68* (MΦ marker gene) but not *CNR1* in the mice which received 12 weeks of CL-HFS versus ND. n=5, data are presented as mean ± SD. **b** Expression of hepatic *Gpr119* and *Cd68* in healthy subjects and human patients with NASH. qPCR detected significantly increased mRNA expression of hepatic *Gpr119* and *Cd68* but not *Cnr1* in patients with NASH compared to healthy individuals. n=7, data are presented as mean ± SD. Statistical analysis of data was performed by Mann–Whitney test (two-tailed). Source data are provided as a Source Data file.

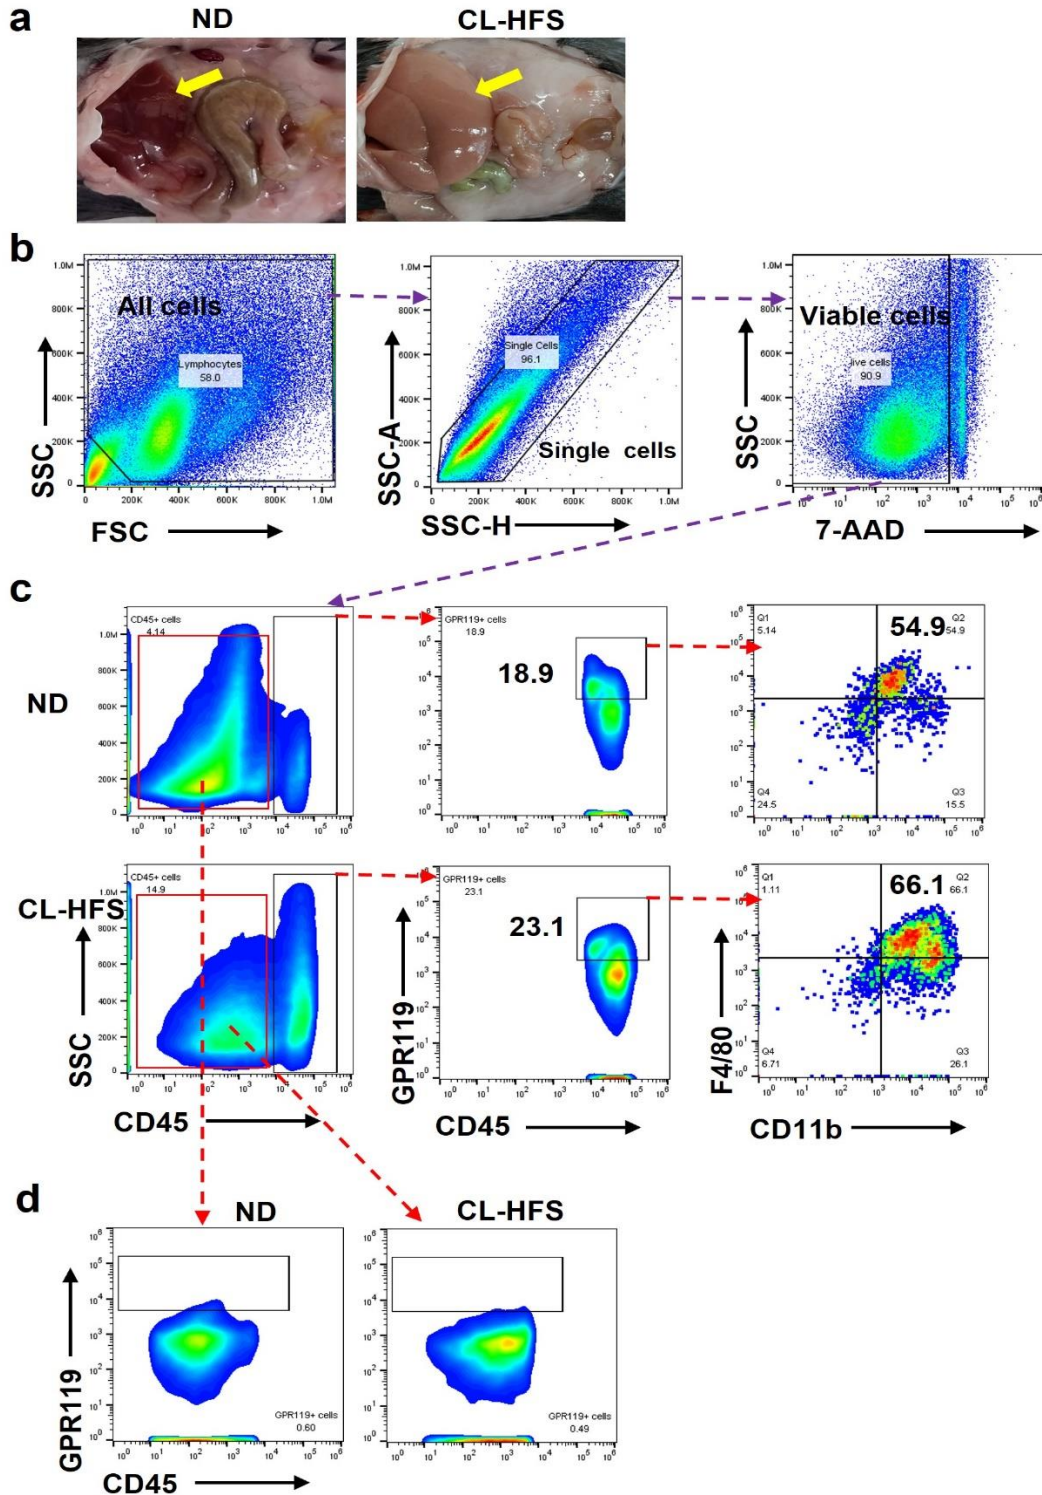

**Supplementary Fig. 14. Cell gating and flow cytometric analysis to detect hepatic GPR119 expression in the different kinds of hepatic cells. a** Macroscopic images of livers from ND- or CL-HFS-fed mice. Six-week-old WT mice were fed with ND or CL-HFS for 12 weeks, then

ethanized for isolation of liver NPCs. **b** Cell gating and flow cytometric analysis. Representative flow cytometry figures show cell gating for viable hepatic cells. Left: SSC vs FSC for excluding debris; Middle: SSC-A vs SSC-H for gating single cells; Right: SSC vs viable dye 7-AAD for excluding dead cells. **c** GPR119 expression in liver CD45<sup>+</sup> cells. SSC vs CD45 for separating leukocytes and hepatocytes. The data showed that the expression of GPR119 and CD45 was mainly seen in hepatic MΦs (F4/80<sup>+</sup>CD11b<sup>+</sup>) in both ND and CL-HFS-fed mice. **d** GPR119 expression in liver-resident CD45<sup>-</sup> cells. The data showed that only a small population of hepatocytes express GPR119 in both ND and CL-HFS-fed mice.

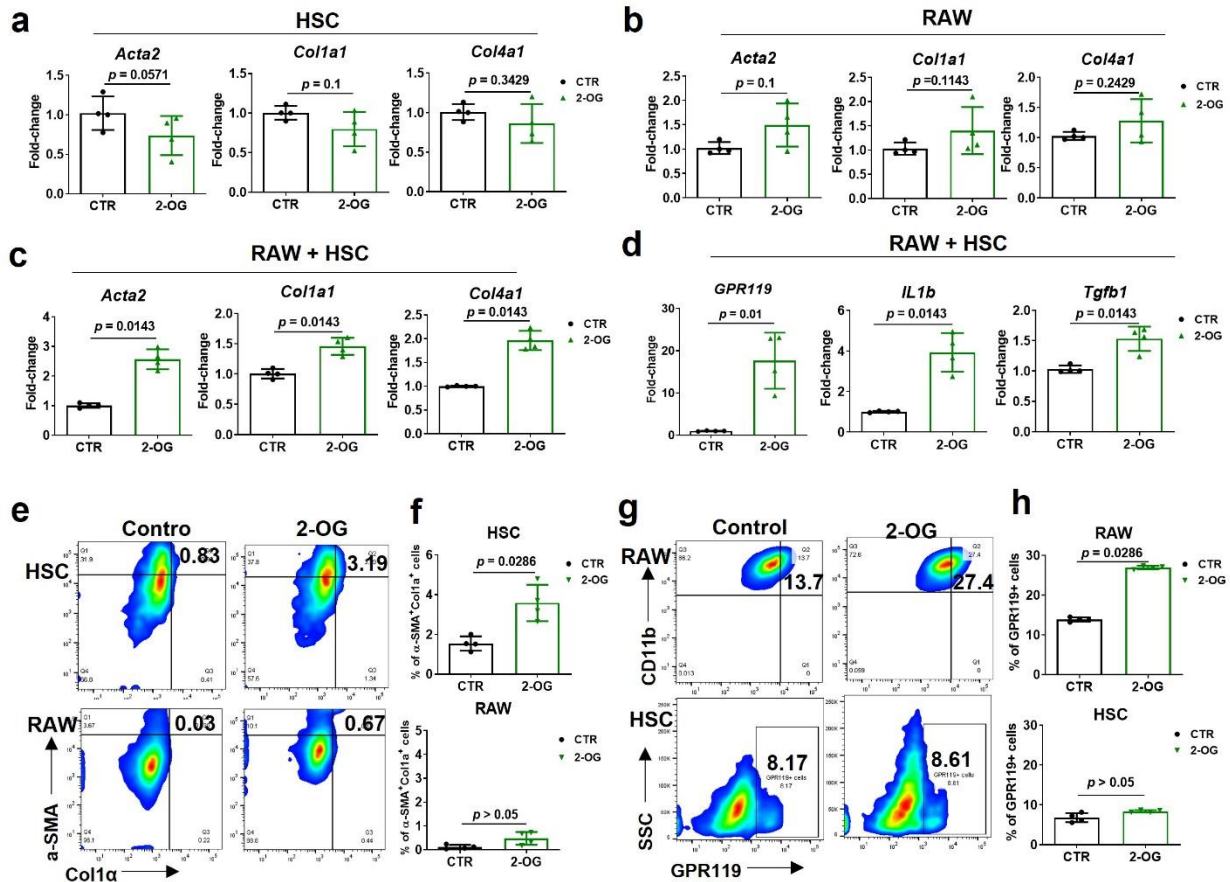

**Supplementary Fig. 15. 2-OG activates HSC in the presence of MΦ by promoting GPR119 expression.** Mouse HSCs, RAW264.7 cells, or co-cultured HSCs and RAW264.7 cells at a ratio of 1:1 did or did not receive stimulation with 2-OG at a dose of 50 μg/mL for 24 hours. qPCR was used to detect the mRNA expression of different genes. **a** Effect of 2-OG stimulation on ECM genes *Acta2*, *Col1a1*, and *Col4a1* in HSCs. **b** Effect of 2-OG stimulation on ECM genes in RAW264.7 cells. **c** Effect of 2-OG stimulation on ECM genes in the co-cultured cells. qPCR detected a significant increase in the mRNA expression of ECM genes *Acta2*, *Col1a1*, and *Col4a1*. **d** Expression of GPR119 and inflammatory cytokines in co-cultured cells in response to 2-OG stimulation. qPCR detected a significant increase in the mRNA expression of genes *Gpr119*, *Il1b*, and *Tgfb1* in 2-OG-treated cells. **e** HSC activation in co-cultured cells in response to 2-OG stimulation. Representative flow cytometry showed that 2-OG stimulation induced a significant increase in the frequency of HSCs positive for α-SMA and Col1α, but not RAW264.7 cells positive for CD11b and CD45. **f** Mean frequency of HSCs and RAW264.7 cells in **e**. The cumulative data showed that 2-OG stimulation induced a significant increase in the frequency of activated HSCs, but not RAW264.7 cells. **g** GPR119 expression in the co-cultured HSCs and RAW264.7 cells. Representative flow cytometry showed that 2-OG stimulation led to a significant

increase in the expression of GPR119 in CD11b<sup>+</sup>CD45<sup>+</sup> RAW264.7 cells, but not CD11b<sup>-</sup>CD45<sup>-</sup> HSCs. **h** Mean frequency of GPR119-expressing HSCs and RAW264.7 cells. The cumulative data showed that 2-OG stimulation induced a significant increase in the frequency of RAW264.7 cells, but not HSCs, expressing GPR119. n=4, data are presented as mean  $\pm$  SD. The assay was repeated twice. Statistical analysis of data was performed by Mann–Whitney test (one-tailed for **a-d**; two-tailed for **f** and **h**). Source data are provided as a Source Data file.

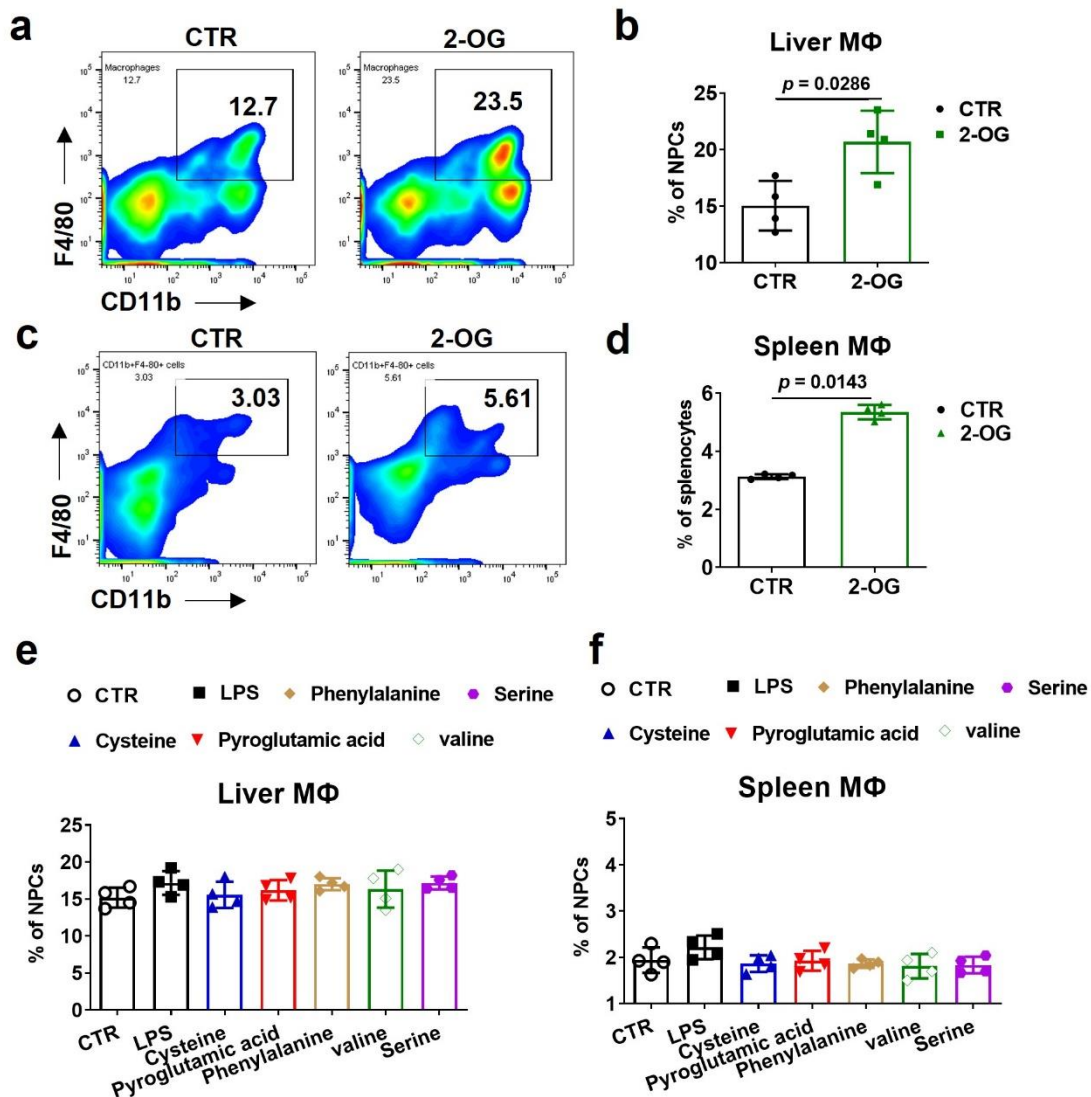

**Supplementary Fig. 16. 2-OG stimulates MΦ proliferation in hepatic NPCs and splenocytes.**

**a** 2-OG stimulates MΦ proliferation in NPCs. Isolated hepatic NPCs from WT mice did or did not receive 2-OG stimulation for 24 hours. Representative flow cytometry detected a one-fold increase in the frequency of CD11b<sup>+</sup>F4/80<sup>+</sup>MΦs in 2-OG stimulated NPCs. **b** Mean frequency of MΦs in 2-OG-stimulated hepatic NPCs. The cumulative results of flow cytometry indicated that 2-OG stimulation led to a significant increase in the frequency of CD11b<sup>+</sup>F4/80<sup>+</sup>MΦs in NPCs. **c** 2-OG stimulates MΦ proliferation in splenocytes. RBC-depleted splenocytes did or did not receive 2-OG stimulation for 24 hours. Flow cytometry detected an increase in the frequency of CD11b<sup>+</sup>F4/80<sup>+</sup>MΦs in 2-OG stimulated splenocytes. **d** Mean frequency of CD11b<sup>+</sup>F4/80<sup>+</sup>MΦs in 2-OG stimulated splenocytes. Cumulative results of flow cytometry indicated that 2-OG stimulation significantly increased the frequency of CD11b<sup>+</sup>F4/80<sup>+</sup>MΦs in the splenocytes. **e** The

effect of other metabolites on M $\Phi$  generation in hepatic NPCs. Isolated hepatic NPCs from WT mice were treated with the indicated metabolites for 24 hours and then underwent flow cytometry. The cumulative results showed that the indicated metabolites did not induce a significant change in the mean frequency of M $\Phi$ s. **f** The effect of other metabolites on M $\Phi$  generation in splenocytes. Isolated splenocytes from WT mice were treated with the indicated metabolites for 24 hours and then underwent flow cytometry. The cumulative results showed that the indicated metabolites did not induce a significant change in the mean frequency of M $\Phi$ s. n=4, data are presented as mean  $\pm$  SD. The assay was repeated twice. Statistical analysis of data was performed by Mann–Whitney test (one-tailed). Source data are provided as a Source Data file.



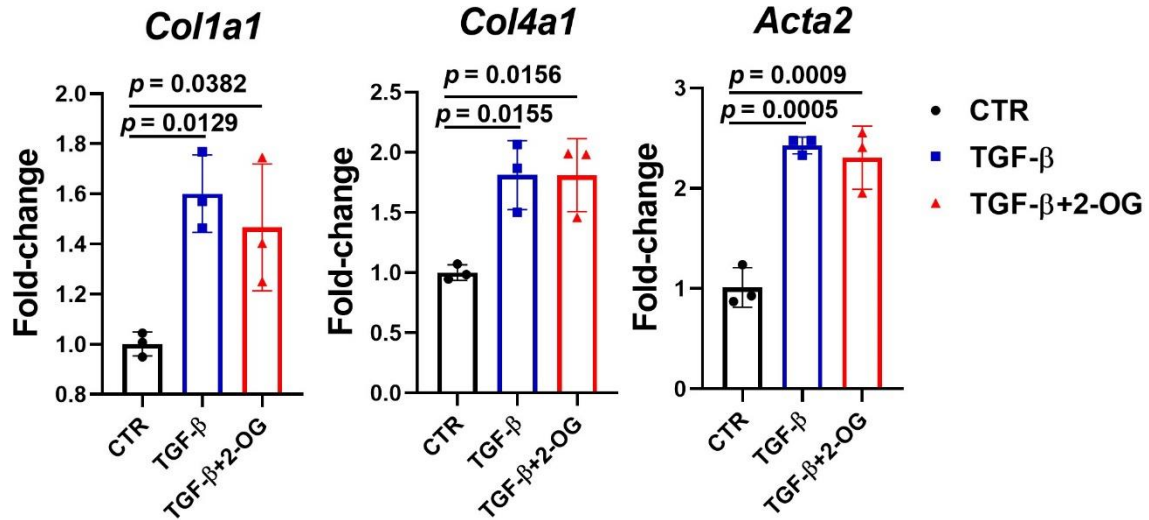

**Supplementary fig. 17. 2-OG does not promote TGF- $\beta$ -induced HSC activation.** HSCs were stimulated with TGF- $\beta$  (10 ng/mL) in the presence or absence of 2-OG co-stimulation (50  $\mu$ g/mL) for 24 hours. qPCR detected a significant increase of gene expression of *Col1a1*, *Col4a1*, and *Acta2* in TGF- $\beta$ -stimulated HSCs. However, the effect was not further enhanced by 2-OG treatment. n=3, data are presented as mean  $\pm$  SD. The assay was repeated twice. Statistical analysis of data was performed by one-way ANOVA with Tukey's multiple comparison test. Source data are provided as a Source Data file.

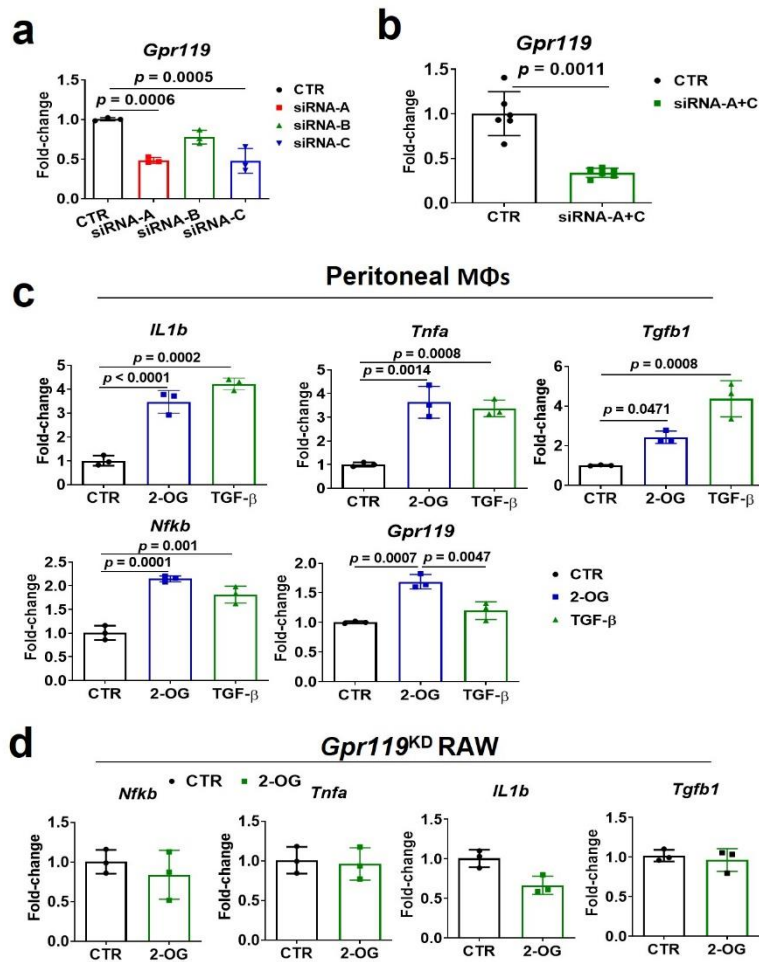

**Supplementary Fig. 18. GPR119 is required for 2-OG to activate MΦs.** **a, b** Validation of siRNA for *Gpr119* knockdown. Three genome-wide siRNAs for *Gpr119* were transfected into RAW264.7 cells. 48 hours later, the cells were harvested to extract total RNAs for qPCR assay. The results showed that siRNA-A, siRNA-C (**a**,  $n=3$ ), or their combination (**b**,  $n=6$ ), but not siRNA-B, significantly suppressed GPR119 expression in RAW264.7 cells. **c** 2-OG activates peritoneal MΦs. Isolated peritoneal MΦs from WT mice received 2-OG or TGF- $\beta$  (10 ng/mL, positive control) stimulation for 24 hours. qPCR detected significantly increased mRNA expression of genes *IL1b*, *Tnfa*, *Tgfb1*, and *Nfkb* in both 2-OG and TGF- $\beta$ -stimulated MΦs; however, a significant increase in *Gpr119* expression was only detected in 2-OG-stimulated MΦs.  $n=3$ . **d** 2-OG was unable to activate RAW264.7 cells with siRNA-mediated *Gpr119* knockdown. RAW264.7 cells received siRNAs transfection for 48 hours to knock down *Gpr119*, followed by 2-OG stimulation for 24 hours. After that, the cells were harvested to extract total RNAs for qPCR assay. The results showed that 2-OG stimulation did not significantly change the production of *Nfkb*, *Tnfa*, *IL1b*, and *Tgfb1* in RAW264.7 cells with *Gpr119* knockdown.  $n=3$ . Data are presented as mean  $\pm$  SD. The

assay was repeated twice. Statistical analysis of data was performed by Mann–Whitney test (one-tailed) or one-way ANOVA with Tukey’s multiple comparison test. Source data are provided as a Source Data file.

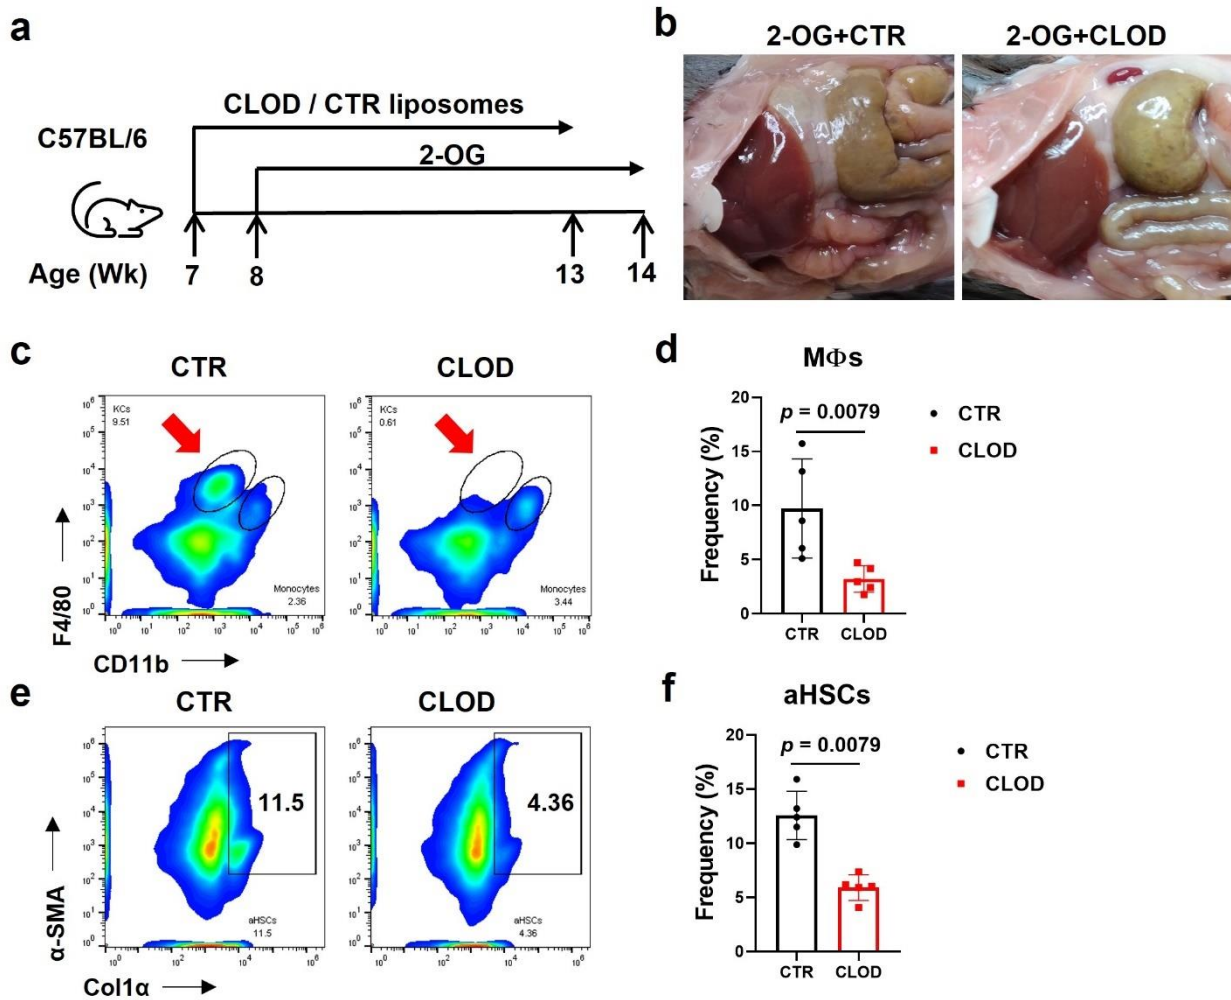

**Supplementary Fig. 19. Depletion of liver resident MΦs suppresses 2-OG-mediated HSC activation.** **a** An outline depicting the treatment of mice with clodronate liposomes (CLOD) and 2-OG. Seven-week-old WT mice received I.P. injection of CLOD once a week for 7 weeks to deplete MΦs. Control liposome (CTR) was used for control. One week after the final treatment, mice received 2-OG i.v. injection three times a week for 6 weeks at a dose of 20 μg/mouse in 0.2 mL PBS (Fig. 6). After that, all mice were euthanized to isolate hepatic NPCs for the following studies. **b** Macroscopic images of the liver in the mice treated with liposomes and 2-OG. **c** Representative frequencies of the liver-resident MΦs in NPCs. Representative flow cytometry analysis showed that CLOD injection caused depletion of one major liver resident MΦs (Kupffer cells), but not monocytes-derived MΦs. **d** Mean frequency of MΦs in NPCs in control and CLOD-treated mice. **e** Representative frequencies of the activated HSCs expressing Col1α and α-SMA in NPCs in control and CLOD-treated mice. **f** Mean frequencies of activated HSCs expressing Col1α and α-SMA in NPCs in control and CLOD-treated mice. Cumulative data showed that

CLOD injection caused a significant decrease in the frequency of activated HSCs expressing Col1 $\alpha$  and  $\alpha$ -SMA in NPCs. n=5, data are presented as mean  $\pm$  SD. Statistical analysis of data was performed by Mann–Whitney test (two-tailed). Source data are provided as a Source Data file.

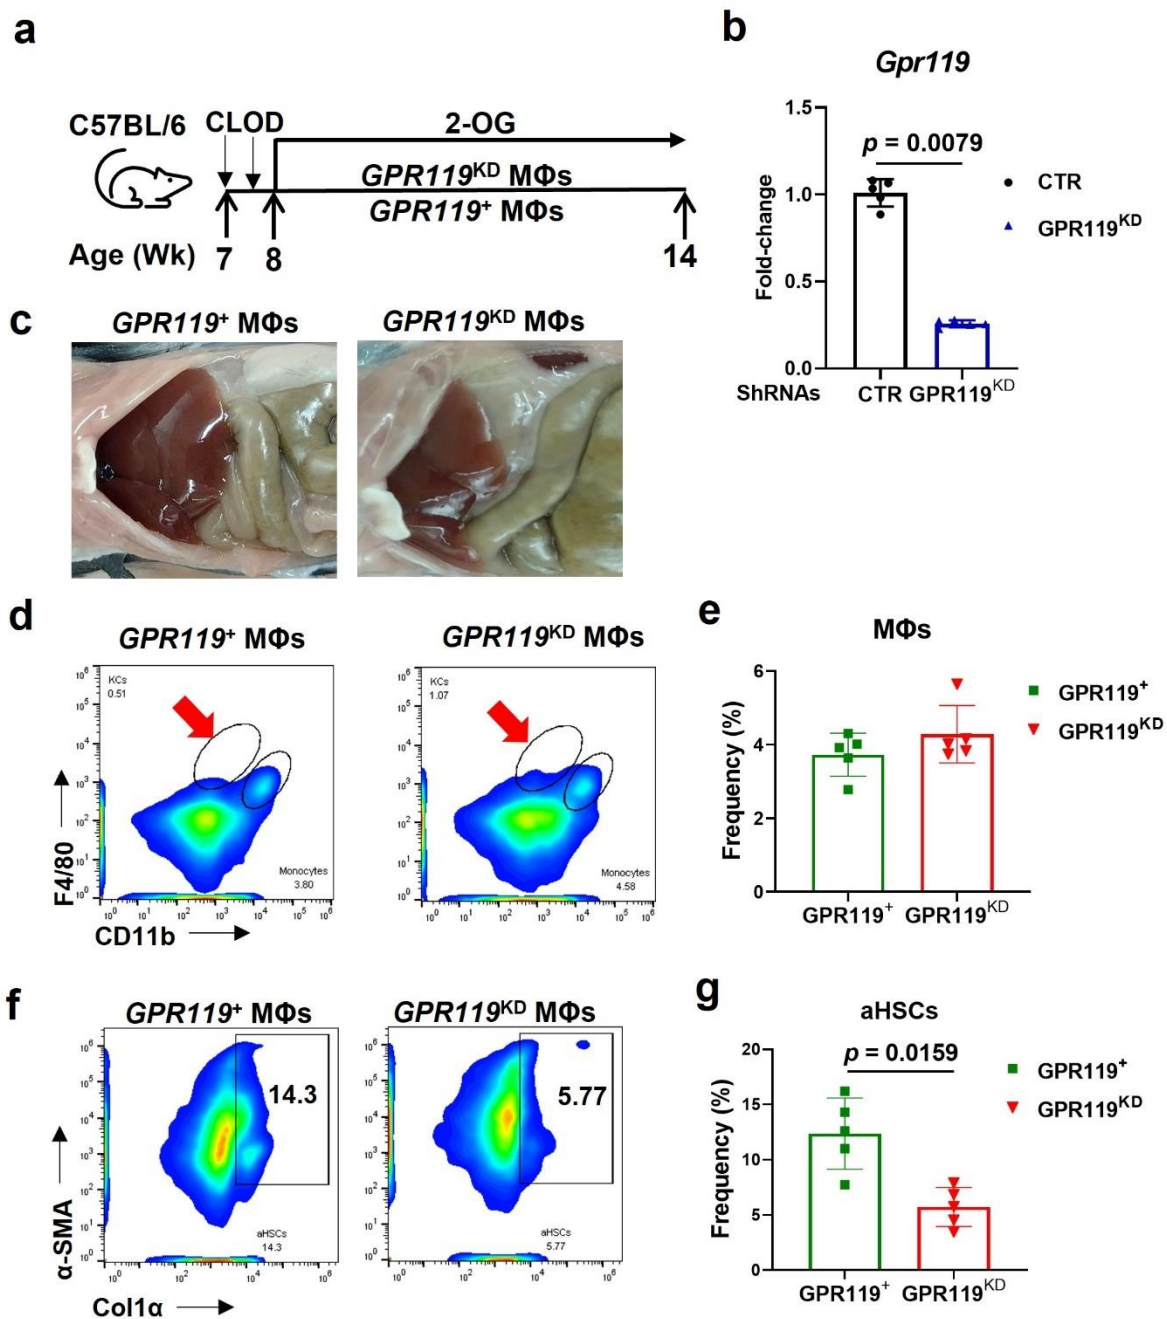

**Supplementary Fig. 20. Adoptive transfer of MΦs with *Gpr119*-knockdown does not enable 2-OG-mediated HSC activation in MΦ-depleted mice.** **a** An outline depicting the experimental design for treating mice with CLOD, 2-OG, and adoptive transfer of MΦs with or without *GPR119*-knockdown. Seven-week-old WT mice received two I.P. injections of CLOD to deplete liver resident MΦs. Control liposomes (CTR) were used for control. After that, mice received i.v. injection of 2-OG three times a week for 6 weeks at a dose of 20 μg/mouse in 0.2 mL PBS (Fig. 6). Simultaneously, mice received the adoptive transfer of MΦs with or without *Gpr119*-

knockdown once a week for six times at a dose of  $2 \times 10^6$  cells/mouse. Then, all mice were euthanized to isolate NPCs for the following studies. **b** Validation of shRNA-expressing lentivirus capacity to knock down *Gpr119* in RAW264.7 cells. qPCR detected that *Gpr119* expression was significantly decreased in MΦs with infection of *Gpr119*-shRNA-expressing lentiviruses versus control lentivirus. **c** Macroscopic images of livers in mice receiving the indicated treatments with adoptive transfer of WT MΦs or *Gpr119*-knockdown MΦs. **d** Representative frequencies of liver-resident MΦs in NPCs. Representative flow cytometry analysis showed that CLOD injection caused depletion of one major liver resident MΦs (Kupffer cells), but not monocytes-derived MΦs. **e** Mean frequencies of liver-resident MΦs in NPCs in two groups of mice ( $p > 0.05$ ). **f** Representative frequencies of the activated HSCs expressing Col1α and α-SMA in NPCs in mice receiving the indicated treatments with adoptive transfer of WT MΦs or *Gpr119*-knockdown MΦs. **g** Mean frequencies of activated HSCs expressing Col1α and α-SMA in NPCs in two groups of mice. Cumulative data showed that the adoptive transfer of WT MΦs, but not *Gpr119*-knockdown MΦs, caused an increase in the frequency of the activated HSCs expressing Col1α and α-SMA in NPCs. n=5, data are presented as mean ± SD. Statistical analysis of data was performed by Mann–Whitney test (two-tailed). Source data are provided as a Source Data file.

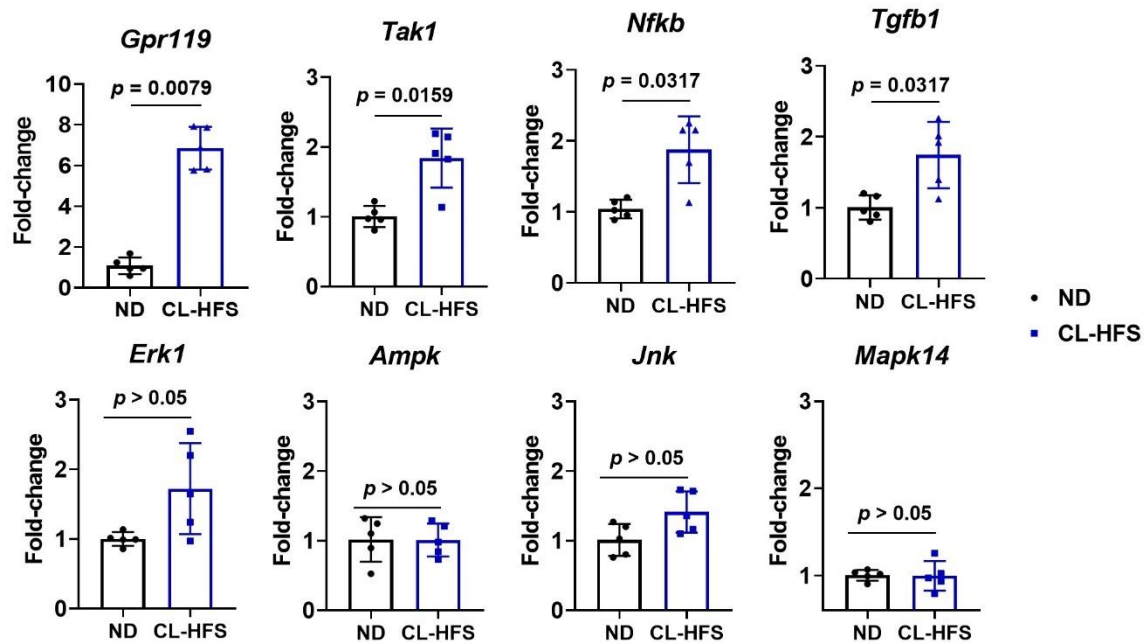

**Supplementary Fig. 21. The signaling events of GPR119 in mouse hepatic MΦs.** Hepatic NPCs were freshly isolated from WT mice that received ND or CL-HFS for 12 weeks. MΦs were purified from isolated NPCs with anti-F4/80 magnetic beads for extraction of total RNAs. qPCR detected significantly increased gene expression of *Gpr119*, *Tak1* (Mitogen-activated protein kinase kinase 7/MAP3K7 or TAK1), *Nfkb*, and *Tgfb1*, but not *Erk1* (Ras-dependent extracellular signal-regulated kinase 1), *AMPK* (AMP-activated protein kinase), JNK (c-Jun N-terminal kinase), and *Mapk14* (Mitogen-activated protein kinase 14/p38α), in the MΦs isolated from CL-HFS-fed mice versus ND-fed mice. n=5, data are presented as mean ± SD. Statistical analysis of data was performed by Mann–Whitney test (two-tailed). Source data are provided as a Source Data file.



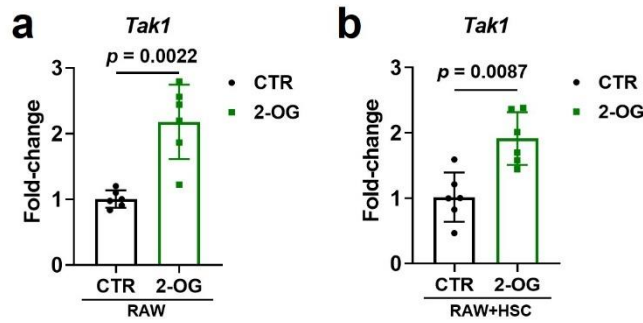

**Supplementary Fig. 22. 2-OG stimulation induces increased TAK1 expression in single or co-cultured RAW264.7 cells with HSCs.** RAW264.7 cells were stimulated with 2-OG for 24 hours in the presence or absence of HSCs. Total RNAs in RAW264.7 cells or co-cultured cells were extracted for qPCR assay. **a** qPCR detected significantly increased mRNA expression of *Tak1* in 2-OG-stimulated RAW264.7 cells versus control cells. **b** qPCR detected significantly increased mRNA expression of *Tak1* in co-cultured cells.  $n=6$ , data are presented as mean  $\pm$  SD. The assay was repeated twice. Statistical analysis of data was performed by Mann–Whitney test (Two-tailed). Source data are provided as a Source Data file.

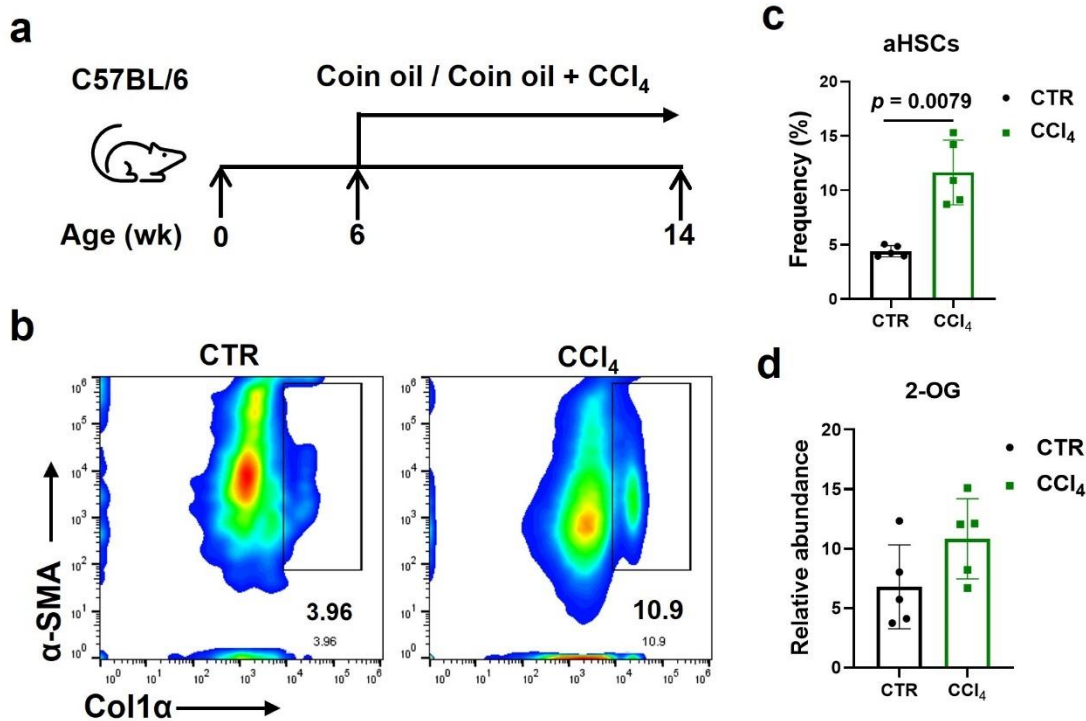

**Supplementary Fig. 23. CCL<sub>4</sub> treatment does not induce 2-OG production.** **a** An outline depicting CCL<sub>4</sub> treatment for inducing mouse liver fibrosis. Six-week-old WT mice received I.P. injection of 10% (v/v) CCL<sub>4</sub> in corn oil twice a week for 8 weeks at 8 mL/kg of body weight to induce liver fibrosis. Coin oil was used as a control. After the treatment, mice were euthanized for the following studies. **b** Representative flow cytometric analysis showed that CCL<sub>4</sub> treatment led to an increase in the frequency of activated HSCs expressing Col1 $\alpha$  and  $\alpha$ -SMA. **c** The mean frequency of activated HSCs expressing  $\alpha$ -SMA and Col1 $\alpha$ . **d** The relative abundance of 2-OG in livers of control and CCL<sub>4</sub>-treated mice ( $p > 0.05$ ).  $n=5$ , data are presented as mean  $\pm$  SD. Statistical analysis of data was performed by Mann–Whitney test (two-tailed). Source data are provided as a Source Data file.

## Supplementary Tables

**Supplementary Table 1. List of liver metabolites identified by spectral matching**

| Number | Metabolite                                                 | Retention time (min) | Quantitative ion (m/z) |
|--------|------------------------------------------------------------|----------------------|------------------------|
| 1      | Trisiloxane, Octamethyl-*                                  | 9.1391               | 87.1                   |
| 2      | Trisiloxane, Octamethyl-*                                  | 9.1411               | 95.2                   |
| 3      | Methylamine, 2TMS derivative*                              | 9.498                | 64.6                   |
| 4      | Methylamine, 2TMS derivative*                              | 9.5076               | 160.2                  |
| 5      | Bis-trimethylsilyl amine                                   | 9.5125               | 116.1                  |
| 6      | 2-(Dimethylamino)ethanol, TMS derivative                   | 9.9465               | 58.2                   |
| 7      | 1,2,5-Thiadiazole, 3-methyl-                               | 10.5017              | 101.1                  |
| 8      | 4-But-1-enyltrimethylsilane                                | 10.5203              | 113.1                  |
| 9      | Silanamine, N-Methoxy-1,1,1-trimethyl-N-(trimethylsilyl)-* | 10.6195              | 74.2                   |
| 10     | Ethanol, 2-(methylamino)-                                  | 10.7201              | 44.2                   |
| 11     | Ethylbis(trimethylsilyl)amine                              | 10.9715              | 174.2                  |
| 12     | Silanamine, N,N'-methanetetraylbis[1,1,1-trimethyl-*       | 10.9929              | 171.2                  |
| 13     | Disilathiane, hexamethyl-*                                 | 11.1251              | 163.1                  |
| 14     | Disilathiane, hexamethyl-*                                 | 11.1396              | 144.2                  |
| 15     | L-Proline, TMS derivative*                                 | 12.7061              | 70.2                   |
| 16     | 4-Hydroxypyridine,O-TMS                                    | 13.0878              | 152.2                  |
| 17     | Lactic Acid O,O-TMS*                                       | 13.4749              | 46.1                   |
| 18     | Lactic Acid, O,O-TMS*                                      | 13.4791              | 117.2                  |
| 19     | Oxalic acid, 2TMS derivative                               | 13.486               | 88.9                   |
| 20     | 2,2'-Bithiazolidine                                        | 14.6585              | 87.7                   |
| 21     | L-Alanine, N,O-TMS*                                        | 14.6709              | 149.1                  |
| 22     | L-Alanine, N,O-TMS*                                        | 14.6736              | 116.2                  |
| 23     | Glycine, N,O-TMS                                           | 15.1669              | 102.1                  |
| 24     | 1,2-Bis(trimethylsiloxy)ethane                             | 16.1926              | 75.1                   |
| 25     | Pentasiloxane Dodecamethyl                                 | 16.3029              | 282.1                  |
| 26     | Phosphoric Acid, Monomethyl ester, O,O-TMS                 | 16.7162              | 241.1                  |
| 27     | Disiloxane, Hexamethyl                                     | 17.2211              | 216.2                  |
| 28     | L-Valine, N,O-TMS*                                         | 17.8046              | 218.2                  |
| 29     | L-Valine, 2TMS derivative                                  | 17.8074              | 144.2                  |
| 30     | Urea, 2TMS derivative*                                     | 18.488               | 45.1                   |
| 31     | Urea, 2TMS derivative*                                     | 18.4956              | 189.2                  |
| 32     | Urea, N,N-TMS*                                             | 18.8366              | 189.2                  |
| 33     | Ethanol Amine, N,O,O-TMS*                                  | 19.2837              | 174.2                  |
| 34     | Ethanol Amine, N,O,O-TMS*                                  | 19.2864              | 211.1                  |
| 35     | Ethanol Amine, N,O,O-TMS*                                  | 19.2926              | 175.2                  |
| 36     | Silanol, trimethyl-, phosphate (3:1)*                      | 19.3037              | 314.2                  |
| 37     | Glycerol, 3TMS derivative*                                 | 19.3119              | 173.1                  |
| 38     | Glycerol, 3TMS derivative*                                 | 19.3347              | 175.2                  |
| 39     | Glycerol, 3TMS derivative*                                 | 19.3381              | 101.1                  |
| 40     | Glycerol, 3TMS derivative*                                 | 19.3402              | 117.1                  |
| 41     | Silanol, trimethyl-, phosphate (3:1)*                      | 19.3416              | 205.2                  |

|    |                                                                        |         |       |
|----|------------------------------------------------------------------------|---------|-------|
| 42 | Silanol, trimethyl-, phosphate (3:1)*                                  | 19.3471 | 191.1 |
| 43 | Silanol, trimethyl-, phosphate (3:1)*                                  | 19.3505 | 130.1 |
| 44 | Norleucine, N,O-TMS                                                    | 19.3588 | 102.1 |
| 45 | L-Leucine, 2TMS derivative*                                            | 19.3643 | 232.2 |
| 46 | L-Leucine, 2TMS derivative*                                            | 19.3677 | 158.2 |
| 47 | L-Leucine, 2TMS derivative*                                            | 19.3774 | 100.1 |
| 48 | L-Norleucine, 2TMS derivative                                          | 19.3912 | 234.2 |
| 49 | L-Norleucine, 2TMS derivative                                          | 19.3939 | 146.1 |
| 50 | Phosphoric Acid, O,O,O-TMS                                             | 19.4042 | 74.1  |
| 51 | Silanol, trimethyl-, phosphate (3:1)*                                  | 19.4104 | 75.1  |
| 52 | Silanol, trimethyl-, phosphate (3:1)*                                  | 19.4153 | 317.2 |
| 53 | Silanol, trimethyl-, phosphate (3:1)*                                  | 19.4187 | 301.2 |
| 54 | L-Isoleucine, 2TMS derivative                                          | 19.9781 | 45.1  |
| 55 | L-Proline, 2TMS derivative*                                            | 20.2137 | 142.2 |
| 56 | L-Proline, N,O-TMS*                                                    | 20.2178 | 72.1  |
| 57 | Glycine, N,N,O-TMS                                                     | 20.4162 | 174.2 |
| 58 | Uracil, O,O-TMS                                                        | 21.2016 | 99.1  |
| 59 | Fumaric Acid, O,O-TMS                                                  | 21.4744 | 245.1 |
| 60 | L-Serine, N,O,O-TMS*                                                   | 21.6796 | 66.1  |
| 61 | L-Serine, N,O,O-TMS*                                                   | 21.6824 | 205.2 |
| 62 | L-Serine, N,O,O-TMS*                                                   | 21.6838 | 204.2 |
| 63 | L-Alanine, N,N,O-TMS*                                                  | 21.8512 | 188.2 |
| 64 | L-Threonine, N,O,O-TMS                                                 | 22.3568 | 204.2 |
| 65 | L-Aspartic Acid, O,O-TMS                                               | 23.479  | 130.1 |
| 66 | Beta-Alanine, N,O,O-TMS                                                | 23.5748 | 248.2 |
| 67 | Homoserine, N,O,O-TMS                                                  | 24.0143 | 218.2 |
| 68 | Butanal, 2,3,4-tris[(trimethylsilyl)oxy]-, O-methyloxime, [R-(R*,R*)]- | 24.3677 | 103.1 |
| 69 | Malic acid, 3TMS derivative                                            | 24.9395 | 45.1  |
| 70 | Niacin, O-TMS                                                          | 25.2694 | 75.1  |
| 71 | Asparagine [-H2O] (2TMS)                                               | 25.545  | 100.1 |
| 72 | 3-Amino-2-piperidone, 2TMS derivative                                  | 25.5567 | 115.1 |
| 73 | L-Aspartic acid, N,O,O-TMS                                             | 25.802  | 232.2 |
| 74 | L-Methionine, N,O-TMS                                                  | 25.9087 | 128.2 |
| 75 | Pyroglutamic acid (2TMS)                                               | 25.9225 | 202.2 |
| 76 | Pyroglutamic Acid, N,O-TMS*                                            | 26.0631 | 158.2 |
| 77 | Pyroglutamic Acid, N,O-TMS*                                            | 26.0644 | 156.2 |
| 78 | Silane, tetramethyl-*                                                  | 26.0665 | 231.2 |
| 79 | 4-Aminobutyric Acid, N,O,O-TMS                                         | 26.165  | 75.1  |
| 80 | Golm_Cysteine (3TMS)                                                   | 26.703  | 220.2 |
| 81 | L-Phenylalanine, O-TMS                                                 | 26.8677 | 91.2  |
| 82 | Proline [+CO2] (2TMS)                                                  | 27.4243 | 186.2 |
| 83 | L-Glutamic acid (3TMS)                                                 | 28.1497 | 246.2 |
| 84 | L-Phenylalanine, N,O-TMS*                                              | 28.5382 | 267.2 |
| 85 | D-(-)-Ribose, O,O,O,O-TMS, MEOX*                                       | 29.3408 | 231.2 |
| 86 | D-(-)-Ribose, O,O,O,O-TMS, MEOX*                                       | 29.3422 | 100.2 |
| 87 | Xylose, O,O,O,O-TMS, MEOX2                                             | 29.3456 | 103.1 |
| 88 | Xylitol, O,O,O,O,O-TMS                                                 | 29.9883 | 307.2 |
| 89 | Beta-glycerophosphate, O,O,O,O-TMS                                     | 30.4224 | 227.1 |

|     |                                                                           |         |       |
|-----|---------------------------------------------------------------------------|---------|-------|
| 90  | Ribitol (5TMS)                                                            | 30.4423 | 205.2 |
| 91  | Alpha-glycerophosphate ester, 4TMS                                        | 31.2166 | 357.2 |
| 92  | Ribonic acid, 2,3,4,5-tetrakis-O-(trimethylsilyl)-, trimethylsilyl ester* | 31.2656 | 103.1 |
| 93  | Ribonic acid, 2,3,4,5-tetrakis-O-(trimethylsilyl)-, trimethylsilyl ester* | 31.2683 | 292.2 |
| 94  | Ornithine N,N,N,O-TMS 1                                                   | 31.289  | 174.2 |
| 95  | Lyxonic acid (5TMS)                                                       | 31.5129 | 205.2 |
| 96  | Ribonic acid, 2,3,4,5-tetrakis-O-(trimethylsilyl)-, trimethylsilyl ester* | 31.5163 | 292.2 |
| 97  | Ethanolaminophosphate (4TMS)                                              | 31.818  | 315.2 |
| 98  | L-(-)-Sorbofuranose, pentakis(trimethylsilyl) ether                       | 32.1349 | 75.1  |
| 99  | 9H-Purin-6-ol, 2TMS derivative                                            | 32.5469 | 265.2 |
| 100 | 6-Hydroxypurine, N,O-TMS                                                  | 32.5662 | 142.2 |
| 101 | Tetradecanoic Acid, O-TMS                                                 | 33.2964 | 285.2 |
| 102 | L-Lysine, N6,N6-bis(trimethylsilyl)-, trimethylsilyl ester                | 33.4335 | 156.2 |
| 103 | D-(-)-Fructose, O,O,O,O,O-TMS, MEOX1*                                     | 33.5375 | 174.2 |
| 104 | D-Fructose, 1,3,4,5,6-pentakis-O-(trimethylsilyl)-, O-methyloxime*        | 33.5423 | 218.2 |
| 105 | D-Fructose, 1,3,4,5,6-pentakis-O-(trimethylsilyl)-, O-methyloxime*        | 33.5437 | 103.1 |
| 106 | D-Fructose, 1,3,4,5,6-pentakis-O-(trimethylsilyl)-, O-methyloxime*        | 33.5465 | 205.2 |
| 107 | D-(-)-Fructose, O,O,O,O,O-TMS o-methyloxime 1*                            | 33.5548 | 168.1 |
| 108 | D-(-)-Fructose, pentakis(trimethylsilyl) ether, methyloxime (syn)*        | 33.7242 | 190.1 |
| 109 | D-(-)-Fructose, O,O,O,O,O-TMS, MEOX2                                      | 33.7511 | 104.1 |
| 110 | D-(-)-Fructose, pentakis(trimethylsilyl) ether, methyloxime (syn)*        | 33.7573 | 307.2 |
| 111 | D-(-)-Fructose, pentakis(trimethylsilyl) ether, methyloxime (syn)*        | 33.7635 | 74.1  |
| 112 | L-(-)-Sorbose, pentakis(trimethylsilyl) ether, methyloxime (syn)          | 33.7683 | 133.1 |
| 113 | D-(+)-Talose, pentakis(trimethylsilyl) ether, methyloxime (syn)*          | 33.8537 | 163.1 |
| 114 | D-Allose, pentakis(trimethylsilyl) ether, methyloxime (syn)*              | 33.8599 | 343.3 |
| 115 | D-(+)-Talose, pentakis(trimethylsilyl) ether, methyloxime (syn)*          | 33.8758 | 133.1 |
| 116 | D-(+)-Mannose, O,O,O,O,O-TMS, MEOX1*                                      | 33.8792 | 319.2 |
| 117 | D-(+)-Talose, pentakis(trimethylsilyl) ether, methyloxime (syn)*          | 33.8875 | 291.2 |
| 118 | D-(+)-Glucose, O,O,O,O,O-TMS o-methyloxime 1*                             | 33.893  | 205.2 |
| 119 | D-Glucose, 2,3,4,5,6-pentakis-O-(trimethylsilyl)-, o-methyloxime, (1E)-*  | 33.8992 | 204.2 |

|     |                                                                          |         |       |
|-----|--------------------------------------------------------------------------|---------|-------|
| 120 | 1,2-Ethenediol, 2TMS derivative                                          | 34.0528 | 349.2 |
| 121 | D-Glucose, 2,3,4,5,6-pentakis-O-(trimethylsilyl)-, o-methyloxyme, (1Z)-* | 34.1134 | 204.2 |
| 122 | D-(+)-Talose, pentakis(trimethylsilyl) ether, methyloxime (syn)*         | 34.121  | 191.2 |
| 123 | D-(+)-Mannose, O,O,O,O,O-TMS, o-methyloxime 1*                           | 34.141  | 236.2 |
| 124 | D-(+)-Glucose, O,O,O,O,O-TMS, MEOX1*                                     | 34.1486 | 189.2 |
| 125 | D-(+)-Mannose O,O,O,O,O-TMS meox 1*                                      | 34.1562 | 276.3 |
| 126 | D-(+)-Talose, pentakis(trimethylsilyl) ether, methyloxime (syn)*         | 34.172  | 161.2 |
| 127 | D-Glucose, 2,3,4,5,6-pentakis-O-(trimethylsilyl)-, o-methyloxyme, (1Z)-  | 34.1782 | 229.2 |
| 128 | L-Tyrosine, O-trimethylsilyl-, trimethylsilyl ester*                     | 34.1968 | 179.2 |
| 129 | D-Glucose, 2,3,4,5,6-pentakis-O-(trimethylsilyl)-, o-methyloxyme, (1Z)-  | 34.2044 | 320.3 |
| 130 | D-(+)-Glucose O,O,O,O,O-TMS meox 1*                                      | 34.2168 | 366.3 |
| 131 | D-Glucose, 2,3,4,5,6-pentakis-O-(trimethylsilyl)-, O-methyloxime         | 34.2257 | 161.2 |
| 132 | D-(+)-Talose, pentakis(trimethylsilyl) ether, methyloxime (syn)*         | 34.2519 | 101.2 |
| 133 | D-(+)-Talose, pentakis(trimethylsilyl) ether, methyloxime (syn)*         | 34.2533 | 231.2 |
| 134 | D-Glucose, 2,3,4,5,6-pentakis-O-(trimethylsilyl)-, O-methyloxime         | 34.2581 | 291.3 |
| 135 | D-(+)-Talose, pentakis(trimethylsilyl) ether, methyloxime (syn)*         | 34.2629 | 205.3 |
| 136 | D-(+)-Galactose, O,O,O,O,O-TMS, MEOX2*                                   | 34.336  | 205.2 |
| 137 | D-(+)-Mannose O,O,O,O,O-TMS meox 2*                                      | 34.5784 | 396.3 |
| 138 | D-Allose, pentakis(trimethylsilyl) ether, methyloxime (anti)*            | 34.5915 | 174.2 |
| 139 | D-(+)-Talose, pentakis(trimethylsilyl) ether, methyloxime (anti)*        | 34.5984 | 132.2 |
| 140 | D-Allose, pentakis(trimethylsilyl) ether, methyloxime (anti)*            | 34.6081 | 319.4 |
| 141 | D-(+)-Galactose O,O,O,O,O-TMS meox 2*                                    | 34.6142 | 174.2 |
| 142 | 2-Ethylhexanal ethylene glycol acetal                                    | 34.6212 | 41.1  |
| 143 | L-Lysine, N,N,N,O-TMS                                                    | 34.7575 | 154.2 |
| 144 | D-Mannitol, O,O,O,O,O,O-TMS*                                             | 34.9174 | 75.1  |
| 145 | D-Mannitol, O,O,O,O,O,O-TMS*                                             | 34.9194 | 319.2 |
| 146 | Methyl hexadecanoate                                                     | 34.9828 | 74.1  |
| 147 | Hexadecanoic acid, methyl ester                                          | 34.9869 | 270.3 |
| 148 | L-Tyrosine, N,O-bis(trimethylsilyl)-, trimethylsilyl ester*              | 35.1075 | 219.2 |
| 149 | L-Tyrosine, N,O-bis(trimethylsilyl)-, trimethylsilyl ester*              | 35.1096 | 218.2 |
| 150 | D-(+)-Turanose, octakis(trimethylsilyl) ether                            | 35.299  | 361.3 |
| 151 | D-Gluconic acid, 6TMS derivative*                                        | 35.4864 | 319.2 |

|     |                                                                            |         |       |
|-----|----------------------------------------------------------------------------|---------|-------|
| 152 | Galactonic Acid, O,O,O,O,O,O-TMS                                           | 35.4898 | 333.2 |
| 153 | Gluconic Acid (6TMS)*                                                      | 36.1415 | 205.2 |
| 154 | Xanthine, N,O,O-TMS                                                        | 36.5817 | 354.2 |
| 155 | 7-(Trimethylsilyl)-2,6-bis[(trimethylsilyl)oxy]-7H-purine                  | 36.5866 | 353.2 |
| 156 | Hexadecenoic acid, 9-(Z)-(1TMS)                                            | 36.7051 | 117.1 |
| 157 | Palmitelaidic acid, TMS derivative*                                        | 36.7106 | 311.3 |
| 158 | Palmitelaidic acid, TMS derivative*                                        | 36.8132 | 75.1  |
| 159 | 2-Tridecanol, TMS derivative                                               | 37.2245 | 119.1 |
| 160 | Hexadecanoic Acid, O-TMS*                                                  | 37.2293 | 313.4 |
| 161 | Hexadecanoic Acid, O-TMS*                                                  | 37.232  | 75.1  |
| 162 | Myo-Inositol, O,O,O,O,O,O-TMS                                              | 37.9278 | 305.2 |
| 163 | Methyl linoleate                                                           | 38.211  | 67.1  |
| 164 | Oleic acid*                                                                | 38.3081 | 55.2  |
| 165 | D-Galactose, 2,3,4,5,6-pentakis-O-(trimethylsilyl)-, o-methyloxyme, (1Z)-* | 38.5919 | 321.2 |
| 166 | D-Galactose, 2,3,4,5,6-pentakis-O-(trimethylsilyl)-, o-methyloxyme, (1Z)-* | 38.5967 | 205.2 |
| 167 | D-(+)-Galactose, pentakis(trimethylsilyl) ether, ethyloxime (isomer 2)*    | 38.7104 | 319.2 |
| 168 | Heptadecanoic acid, O-TMS                                                  | 38.966  | 43.2  |
| 169 | Octadecatrienoic acid, 6,9,12-(Z,Z,Z)-, n-1TMS                             | 39.874  | 41.2  |
| 170 | 9,12-Octadecadienoic acid (Z,Z)-, TMS derivative                           | 40.2473 | 102.1 |
| 171 | Linoleic Acid, O-TMS                                                       | 40.2597 | 202.2 |
| 172 | Octadecenoic acid, 9-(Z)- (1TMS)                                           | 40.3548 | 202.2 |
| 173 | Cyclohexanol, 2-(trimethylsilyl)-, cis-                                    | 40.3651 | 161.2 |
| 174 | Oleic Acid, (Z)-, TMS derivative*                                          | 40.3734 | 41.2  |
| 175 | 9-Octadecenoic acid, (E)-, TMS derivative                                  | 40.4299 | 75.1  |
| 176 | Glyceryl-glycoside TMS ether                                               | 40.6386 | 205.2 |
| 177 | Stearic Acid, O-TMS                                                        | 40.7233 | 117.1 |
| 178 | Alpha-Farnesene; 1,3,6,10-Dodecatetraene, 3,7,11-trimethyl-                | 41.1615 | 79.1  |
| 179 | Galactosyl glycerol 6TMS                                                   | 41.3578 | 129.1 |
| 180 | Glyceryl-glycoside TMS ether                                               | 41.3592 | 204.2 |
| 181 | 2-O-Glycerol-alpha-d-galactopyranoside, hexa-TMS*                          | 41.4866 | 204.2 |
| 182 | Eicosatetraenoic acid, 5,8,11,14-(Z,Z,Z,Z)-(1TMS)*                         | 42.9058 | 75.1  |
| 183 | Eicosapentaenoic Acid, TMS derivative*                                     | 42.9946 | 78.2  |
| 184 | Eicosapentaenoic acid, TMS derivative*                                     | 43.0077 | 75.1  |
| 185 | (8Z,11Z,14Z)-Icosa-8,11,14-trienoate, O-TMS                                | 43.2082 | 75.1  |
| 186 | 5-Methyluridine, 3TMS derivative*                                          | 43.3115 | 259.2 |
| 187 | 5-Methyluridine, 3TMS derivative*                                          | 43.317  | 183.1 |
| 188 | 11,14-Eicosadienoic acid, TMS derivative                                   | 43.5189 | 75.1  |
| 189 | Uridine, 4TMS derivative                                                   | 43.9467 | 243.2 |
| 190 | Uridine (3TMS)                                                             | 44.1485 | 75.1  |
| 191 | Arachidonic acid, TMS derivative*                                          | 45.735  | 79.1  |

|     |                                                                            |         |       |
|-----|----------------------------------------------------------------------------|---------|-------|
| 192 | Doconexent, TMS derivative                                                 | 45.8762 | 91.2  |
| 193 | Arachidonic acid, TMS derivative*                                          | 45.9913 | 80.2  |
| 194 | 1-Monopalmitin, 2TMS derivative                                            | 46.096  | 371.4 |
| 195 | Docosahexaenoic acid, 4,7,10,13,16,19-(Z,Z,Z,Z,Z,Z)- (1TMS)                | 46.1091 | 75.1  |
| 196 | Eicosapentaenoic Acid, TMS derivative*                                     | 46.1139 | 77.1  |
| 197 | D-(+)-Melibiose MEOX2 TMS                                                  | 47.1617 | 243.2 |
| 198 | D-(+)-Cellobiose, octakis(trimethylsilyl) ether, methyloxime (isomer 1)*   | 47.19   | 247.1 |
| 199 | Laminaribose Meox 1                                                        | 47.2182 | 361.2 |
| 200 | Maltose, 8TMS derivative, isomer 2                                         | 47.8244 | 204.2 |
| 201 | Isopropyl-beta-D-thiogalactopyranoside (IPTG), O,O,O,O-TMS                 | 48.0235 | 67.2  |
| 202 | 2-Monooleoylglycerol trimethylsilyl ether*                                 | 48.0587 | 103.1 |
| 203 | 2-oleoylglycerol                                                           | 48.0628 | 55.1  |
| 204 | Silane, tetramethyl-*                                                      | 48.2653 | 420.3 |
| 205 | Maltose, octakis(trimethylsilyl) ether, methyloxime (isomer 1)             | 48.2853 | 208.2 |
| 206 | Maltose (8TMS), MEOX1*                                                     | 48.297  | 361.4 |
| 207 | Maltose Monohydrate MEOX1 TMS*                                             | 48.3094 | 355.2 |
| 208 | 3-alpha-Mannobiose, octakis(trimethylsilyl) ether, methyloxime (isomer 2)* | 48.3749 | 361.2 |
| 209 | 3-alpha-Mannobiose, Octakis(trimethylsilyl) ether, methyloxime (isomer 2)* | 48.379  | 204.2 |
| 210 | Lactose, 8TMS derivative                                                   | 48.5133 | 241.2 |
| 211 | a,b-Trehalose (8TMS); alpha-D-Glc-(1,1)-beta-D-Glc                         | 48.5188 | 191.2 |
| 212 | Nigerose, Meox 1                                                           | 48.556  | 306.2 |
| 213 | 3-alpha-Mannobiose, octakis(trimethylsilyl) ether, methyloxime (isomer 1)  | 48.5643 | 267.1 |
| 214 | Palatinose, TMS                                                            | 48.6738 | 105.1 |
| 215 | Maltose Monohydrate MEOX2 TMS*                                             | 48.6773 | 361.3 |
| 216 | D-(+)-Cellobiose, octakis(trimethylsilyl) ether, methyloxime (isomer 1)*   | 48.6814 | 282.1 |
| 217 | Cellobiose MEOX2 TMS                                                       | 48.7737 | 204.1 |
| 218 | Sophorose (1MEOX) (8TMS) MP                                                | 48.9845 | 319.2 |
| 219 | 3-alpha-Mannobiose, octakis(trimethylsilyl) ether, methyloxime (isomer 2)* | 49.0362 | 271.1 |
| 220 | Laminaribose Meox 2                                                        | 49.0417 | 361.2 |
| 221 | 2-alpha-Mannobiose, octakis(trimethylsilyl) ether, methyloxime (isomer 2)  | 49.32   | 205.1 |
| 222 | Isomaltose MEOX1 TMS                                                       | 50.1054 | 204.2 |
| 223 | Alpha,beta-TREHALOSE TMS                                                   | 50.8232 | 361.2 |
| 224 | 2-O-Glycerol-alpha-d-galactopyranoside, hexa-TMS*                          | 52.7548 | 204.2 |
| 225 | Cholesterol, TMS derivative*                                               | 55.6296 | 214.3 |
| 226 | Cholesterol, TMS derivative*                                               | 55.6613 | 129.1 |
| 227 | Cholesterol, TMS                                                           | 55.6668 | 328.4 |



Ribitol was spiked in each sample as an internal standard. \*Some peaks match the spectrum of the same compound, and further confirmation requires authentic standards.

**Supplementary Table 2. List of unidentified metabolites by spectral matching**

| Number    | Metabolite     | Retention time (min) | Quantitative ion (m/z) | FDR-adjusted <i>p</i> -value post ANOVA analysis (Group vs Group) |
|-----------|----------------|----------------------|------------------------|-------------------------------------------------------------------|
| 1         | Unknown        | 9.1349               | 74.1                   | > 0.05                                                            |
| 2         | Unknown        | 10.4342              | 40.1                   | > 0.05                                                            |
| 3         | Unknown        | 10.4769              | 50.5                   | > 0.05                                                            |
| 4         | Unknown        | 10.532               | 189.1                  | > 0.05                                                            |
| 5         | Unknown        | 10.5837              | 237.1                  | > 0.05                                                            |
| 6         | Unknown        | 10.5947              | 158.2                  | > 0.05                                                            |
| 7         | Unknown        | 10.6071              | 193.2                  | > 0.05                                                            |
| 8         | Unknown        | 10.6422              | 69.2                   | > 0.05                                                            |
| 9         | Unknown        | 11.4358              | 134.1                  | > 0.05                                                            |
| 10        | Unknown        | 14.6791              | 87.7                   | > 0.05                                                            |
| 11        | Unknown        | 18.8407              | 171.1                  | > 0.05                                                            |
| 12        | Unknown        | 19.2706              | 265.1                  | > 0.05                                                            |
| 13        | Unknown        | 19.3856              | 260.2                  | > 0.05                                                            |
| <b>14</b> | <b>Unknown</b> | <b>19.9733</b>       | <b>219.2</b>           | <b>0.049362 (CL-HFS vs CL-HFS+ABX)</b>                            |
| 15        | Unknown        | 21.1988              | 100.1                  | > 0.05                                                            |
| 16        | Unknown        | 24.5516              | 71.2                   | > 0.05                                                            |
| 17        | Unknown        | 24.934               | 131.1                  | > 0.05                                                            |
| 18        | Unknown        | 24.9429              | 191.2                  | > 0.05                                                            |
| <b>19</b> | <b>Unknown</b> | <b>26.0569</b>       | <b>127.1</b>           | <b>0.008926 (ND vs CL-HFS and CL-HFS vs CL-HFS+ABX)</b>           |
| 20        | Unknown        | 26.1685              | 86.1                   | > 0.05                                                            |
| 21        | Unknown        | 28.8448              | 267.1                  | > 0.05                                                            |
| 22        | Unknown        | 30.4106              | 304.2                  | > 0.05                                                            |
| 23        | Unknown        | 30.4286              | 299.2                  | 0.0251 (ND vs CL-HFS+ABX)                                         |
| 24        | Unknown        | 30.4472              | 102.1                  | > 0.05                                                            |
| 25        | Unknown        | 31.807               | 301.1                  | > 0.05                                                            |
| 26        | Unknown        | 31.8139              | 299.1                  | > 0.05                                                            |
| <b>27</b> | <b>Unknown</b> | <b>32.5683</b>       | <b>214.2</b>           | <b>0.037728 (CL-HFS vs CL-HFS+ABX)</b>                            |
| 28        | Unknown        | 32.7556              | 428.3                  | > 0.05                                                            |
| 29        | Unknown        | 33.4287              | 74.1                   | > 0.05                                                            |
| 30        | Unknown        | 33.716               | 114.1                  | > 0.05                                                            |
| 31        | Unknown        | 33.7304              | 293.1                  | 0.036287 (ND vs CL-HFS and ND vs CL-HFS+ABX)                      |
| 32        | Unknown        | 33.7428              | 309.2                  | > 0.05                                                            |
| 33        | Unknown        | 33.8682              | 45.1                   | > 0.05                                                            |
| 34        | Unknown        | 33.9061              | 300.2                  | > 0.05                                                            |
| 35        | Unknown        | 34.0942              | 357.2                  | > 0.05                                                            |

|           |                |                |              |                                                          |
|-----------|----------------|----------------|--------------|----------------------------------------------------------|
| 36        | Unknown        | 34.1348        | 280.3        | > 0.05                                                   |
| 37        | Unknown        | 34.1851        | 290.3        | > 0.05                                                   |
| 38        | Unknown        | 34.1906        | 192.2        | > 0.05                                                   |
| 39        | Unknown        | 34.2099        | 274.2        | > 0.05                                                   |
| 40        | Unknown        | 34.2326        | 269.2        | > 0.05                                                   |
| 41        | Unknown        | 34.2374        | 218.2        | > 0.05                                                   |
| 42        | Unknown        | 34.2395        | 305.3        | > 0.05                                                   |
| 43        | Unknown        | 34.2457        | 233.2        | > 0.05                                                   |
| 44        | Unknown        | 34.2705        | 479.5        | > 0.05                                                   |
| 45        | Unknown        | 34.606         | 321.3        | > 0.05                                                   |
| 46        | Unknown        | 34.75          | 149.1        | > 0.05                                                   |
| 47        | Unknown        | 34.7589        | 220.2        | > 0.05                                                   |
| 48        | Unknown        | 34.9146        | 104.1        | > 0.05                                                   |
| 49        | Unknown        | 35.1109        | 179.2        | > 0.05                                                   |
| <b>50</b> | <b>Unknown</b> | <b>35.1185</b> | <b>248.1</b> | <b>0.021101 (CL-HFS vs CL-HFS+ABX)</b>                   |
| 51        | Unknown        | 35.5505        | 333.3        | > 0.05                                                   |
| 52        | Unknown        | 35.5553        | 204.2        | > 0.05                                                   |
| 53        | Unknown        | 35.558         | 134.1        | > 0.05                                                   |
| 54        | Unknown        | 37.1935        | 265.1        | > 0.05                                                   |
| <b>55</b> | <b>Unknown</b> | <b>37.9347</b> | <b>157.1</b> | <b>0.0251 (ND vs CL-HFS, CL-HFS vs CL-HFS+ABX)</b>       |
| 56        | Unknown        | 38.2082        | 68.2         | > 0.05                                                   |
| 57        | Unknown        | 39.8781        | 79.1         | 0.0251 (ND vs CL-HFS+ABX)                                |
| 58        | Unknown        | 40.0544        | 211.1        | > 0.05                                                   |
| 59        | Unknown        | 40.3341        | 293.2        | > 0.05                                                   |
| 60        | Unknown        | 40.4278        | 129.1        | > 0.05                                                   |
| 61        | Unknown        | 42.3677        | 315.1        | > 0.05                                                   |
| 62        | Unknown        | 42.8989        | 377.3        | > 0.05                                                   |
| 63        | Unknown        | 42.9085        | 238.2        | > 0.05                                                   |
| 64        | Unknown        | 43.5857        | 367.3        | > 0.05                                                   |
| 65        | Unknown        | 44.1582        | 169.1        | > 0.05                                                   |
| 66        | Unknown        | 45.8687        | 122.1        | > 0.05                                                   |
| 67        | Unknown        | 45.879         | 204.2        | > 0.05                                                   |
| 68        | Unknown        | 45.9872        | 75.1         | > 0.05                                                   |
| 69        | Unknown        | 47.1369        | 160.1        | > 0.05                                                   |
| <b>70</b> | <b>Unknown</b> | <b>48.0704</b> | <b>83.2</b>  | <b>0.0073985 (ND vs CL-HFS and CL-HFS vs CL-HFS+ABX)</b> |
| 71        | Unknown        | 48.1703        | 262.2        | > 0.05                                                   |
| 72        | Unknown        | 48.182         | 361.3        | > 0.05                                                   |
| 73        | Unknown        | 48.3025        | 207.2        | > 0.05                                                   |
| 74        | Unknown        | 48.5491        | 377.2        | 0.0251 (ND vs CL-HFS and ND vs CL-HFS+ABX)               |
| 75        | Unknown        | 48.5739        | 397.4        | > 0.05                                                   |
| 76        | Unknown        | 48.8839        | 400.4        | > 0.05                                                   |
| 77        | Unknown        | 48.8984        | 400.4        | > 0.05                                                   |

|    |         |         |       |                                              |
|----|---------|---------|-------|----------------------------------------------|
| 78 | Unknown | 48.9742 | 371.2 | > 0.05                                       |
| 79 | Unknown | 48.9825 | 191.2 | > 0.05                                       |
| 80 | Unknown | 55.6234 | 248.3 | 0.039744 (ND vs CL-HFS and ND vs CL-HFS+ABX) |
| 81 | Unknown | 55.6509 | 156.2 | 0.035439 (ND vs CL-HFS and ND vs CL-HFS+ABX) |
| 82 | Unknown | 55.6592 | 368.4 | 0.043583 (ND vs CL-HFS and ND vs CL-HFS+ABX) |

These metabolites were not identified by spectral matching. FDR-adjusted  $p$ -values of the ANOVA analysis with Tukey's multiple comparison test as well as the two-group comparison significance are listed, and the ones that are significantly different ( $p < 0.05$ ) between CL-HFS vs CL-HFS+ABX group are highlighted in this table.

**Supplementary Table 3. Clinical information for NASH patients.**

| <b>Patients with obesity</b> | <b>Age (Year)</b> | <b>Weight (kg)</b> | <b>BMI* (kg/m<sup>2</sup>)</b> | <b>AST (U/L)</b> | <b>ALT (U/L)</b> | <b>Glucose (mg/dL)</b> | <b>NAS</b> |
|------------------------------|-------------------|--------------------|--------------------------------|------------------|------------------|------------------------|------------|
| Control                      | 42 ± 14           | 154.6 ± 11.1       | 55.3 ± 0.5                     | 26 ± 11.2        | 23.8 ± 7.8       | 89.3 ± 9.25            | 1.5 ± 0.58 |
| NASH                         | 40 ± 15           | 132.3 ± 36.1       | 49.5 ± 10.3                    | 28 ± 4           | 38 ± 5.1         | 116.5 ± 39.9           | 5.3 ± 0.5  |

\*Abbreviations: AST: aspartate aminotransferase; ALT: alanine aminotransferase BMI: Body mass index; NAS: NAFLD activity score.

**Supplementary Table 4. List of primers used in real-time PCR.**

| <b>Primers</b>     | <b>Forward (5'-3')</b>  | <b>Reverse (5'-3')</b>   |
|--------------------|-------------------------|--------------------------|
| <b>Mouse genes</b> |                         |                          |
| <i>Acta2</i>       | GGCTCTGGGCTCTGTAAGG     | CTCTTGCTCTGGGCTTCATC     |
| <i>Adipoq</i>      | TTCAGTACTGCTCGCTGGA     | CACCCCTGATGCTCTCCTAG     |
| <i>Cnr1</i>        | TCTGCTTGCGATCATGGTGT    | GCATGTCTCAGGTCCTTGCT     |
| <i>Ccl2</i>        | CCCCAAGAAGGAATGGGTCC    | GTGCTGAAGACCTTAGGGCA     |
| <i>Cd68</i>        | GACACTTCGGGCCATGTT      | GAGGAGGACCAGGCCAAT       |
| <i>Col1a1</i>      | CCAAGGGTAACAGCGGTGAA    | CCTCGTTTTCTTCTTCTCCG     |
| <i>Col4a1</i>      | TTAAAGGACTCCAGGGACCAC   | CCCCTGAGCCTGTACACAC      |
| <i>Gpr119</i>      | CTGGCCAATCTGAAGACTACTG  | GGTGATTCCAGACTGCTCTGT    |
| <i>IL1b</i>        | TCTGAAGCAGCTATGGCAAC    | ATGAGTTGGGGACTCTCTGG     |
| <i>Lep</i>         | CTGTCTCCACCCATTCTGT     | CCAAGCCCCTTTGTTTCATCC    |
| <i>Myd88</i>       | CAGTGTCTGGGGGAGGAATG    | CAGGTGGAGGAGGTTTACACT    |
| <i>Nfkb</i>        | TCCACAAGGCAGCAAATAGA    | GGGGCATTITGTTGAGAGTT     |
| <i>Retn</i>        | ACCTCCCCTCACTCCAAAAG    | CCTATGCACACACAAGCTCC     |
| <i>Tgfb1</i>       | GGTTCATGTCATGGATGGTGC   | TGACGTCACTGGAGTTGTACGG   |
| <i>Tnfa</i>        | ACGGCATGGATCTCAAAGAC    | GTGGGTGAGGAGCACGTAGT     |
| 18S                | AAGTCCCTGCCCTTTGTACACA  | GCCTCACTAAACCATCCAATCG   |
| <b>Human genes</b> |                         |                          |
| <i>Acta2</i>       | CCGACCGAATGCAGAAGGA     | ACAGAGTATTTGCGCTCCGAA    |
| <i>Ccl2</i>        | CAGCCAGATGCAATCAATGCC   | TGGAATCCTGAACCCACTTCT    |
| <i>Cd68</i>        | GAACCCCAACAAAACCAAG     | GATGAGAGGCAGCAAGATG      |
| <i>Col1a1</i>      | GAGGGCCAAGACGAAGACATC   | CAGATCACGTCATCGCACAAAC   |
| <i>Col4a1</i>      | CAAGAGGATTTCCAGGTCCA    | TCATTGCCTTGCACGTAGAG     |
| <i>Gpr119</i>      | CTCCCTCATCATTGCTACTAA   | ACAGCCAGATTCAAGGTG       |
| <i>IL1b</i>        | AGCTACGAATCTCCGACCAC    | CGTTATCCCATGTGTGCGAAGAA  |
| <i>IL6</i>         | ACTCACCTCTTCAGAACGAATTG | CCATCTTTGGAAGGTTTCAAGTTG |
| <i>Myd88</i>       | GAAGAAAGAGTTCCCCAGCA    | GTGCAGGGGTTGGTGTAGTC     |
| <i>Nfkb</i>        | TATGTGGGACCAGCAAAGGT    | GCAGATCCCATCCTCACAGT     |
| <i>Tgfb1</i>       | CCCAGCATCTGCAAAGCTC     | GTCAATGTACAGCTGCCGCA     |
| <i>Tnfa</i>        | CCTCTCTAATCAGCCCTCTG    | GAGGACCTGGGAGTAGATGAG    |
| 18S                | CTACCACATCCAAGGAAGCA    | TTTTTCGTCACCTACCTCCCCG   |
| <b>Bacteria</b>    |                         |                          |
| <i>B. producta</i> | CTTGACATCCCTCTGACCGT    | CCTAGAGTGCCCACCATCAT     |

**Supplementary Table 5. List of antibodies for flow cytometry.**

| <b>Reagent</b>                                               | <b>Company</b>    | <b>Dilution</b> | <b>Catalog #</b>  |
|--------------------------------------------------------------|-------------------|-----------------|-------------------|
| APC anti-mouse/human CD45R/B220 antibody (FACS)              | BioLegend         | 1:100           | CAT# 103212       |
| FITC anti-mouse CD3 antibody (FACS)                          | BioLegend         | 1:100           | CAT# 100204       |
| PE anti-mouse CD4 antibody (FACS)                            | BioLegend         | 1:100           | CAT# 116006       |
| BV605 anti-mouse CD8a antibody (FACS)                        | BioLegend         | 1:100           | CAT# 100744       |
| BV605 anti-mouse/human CD11b antibody (FACS)                 | BioLegend         | 1:100           | CAT# 101257       |
| FITC anti-mouse CD11c antibody (FACS)                        | BioLegend         | 1:100           | CAT# 117306       |
| BV421 anti-mouse CD45 antibody (FACS)                        | BioLegend         | 1:100           | CAT# 103133       |
| FITC anti-mouse CD49b (pan-NK cells) antibody (FACS)         | BioLegend         | 1:100           | CAT# 108906       |
| APC anti-mouse F4/80 antibody                                | BioLegend         | 1:100           | CAT# 123116       |
| FITC anti-mouse NK-1.1 antibody                              | BioLegend         | 1:100           | CAT# 108706       |
| 7-AAD Viability staining solution                            | BioLegend         | 1:100           | CAT# 420404       |
| Fixable Viability Dye eFluor™ 780                            | Invitrogen        | 1:1000          | CAT# 65-0865-14   |
| FITC anti-mouse collagen I alpha 1 antibody                  | Novus Biologicals | 1:100           | CAT# NBP1-77458F  |
| PE anti-mouse alpha-smooth muscle actin antibody (1A4/asm-1) | Novus Biologicals | 1:100           | CAT# NBP2-34522PE |
| Alexa Fluor 488 (FITC) anti-mouse GPR119 antibody            | Novus Biologicals | 1:100           | CAT# NLS548AF488  |
| Anti-alpha smooth muscle actin antibody [E184]               | Abcam             | 1:300           | CAT# ab32575      |
